# Supplementary material for: m6A modifications regulate intestinal immunity and rotavirus infection
Source: eLife journal article supplement (doi:10.7554/elife.73628), 2022-01-31
Supplement: supp [file elife-73628-supp-v1.zip]

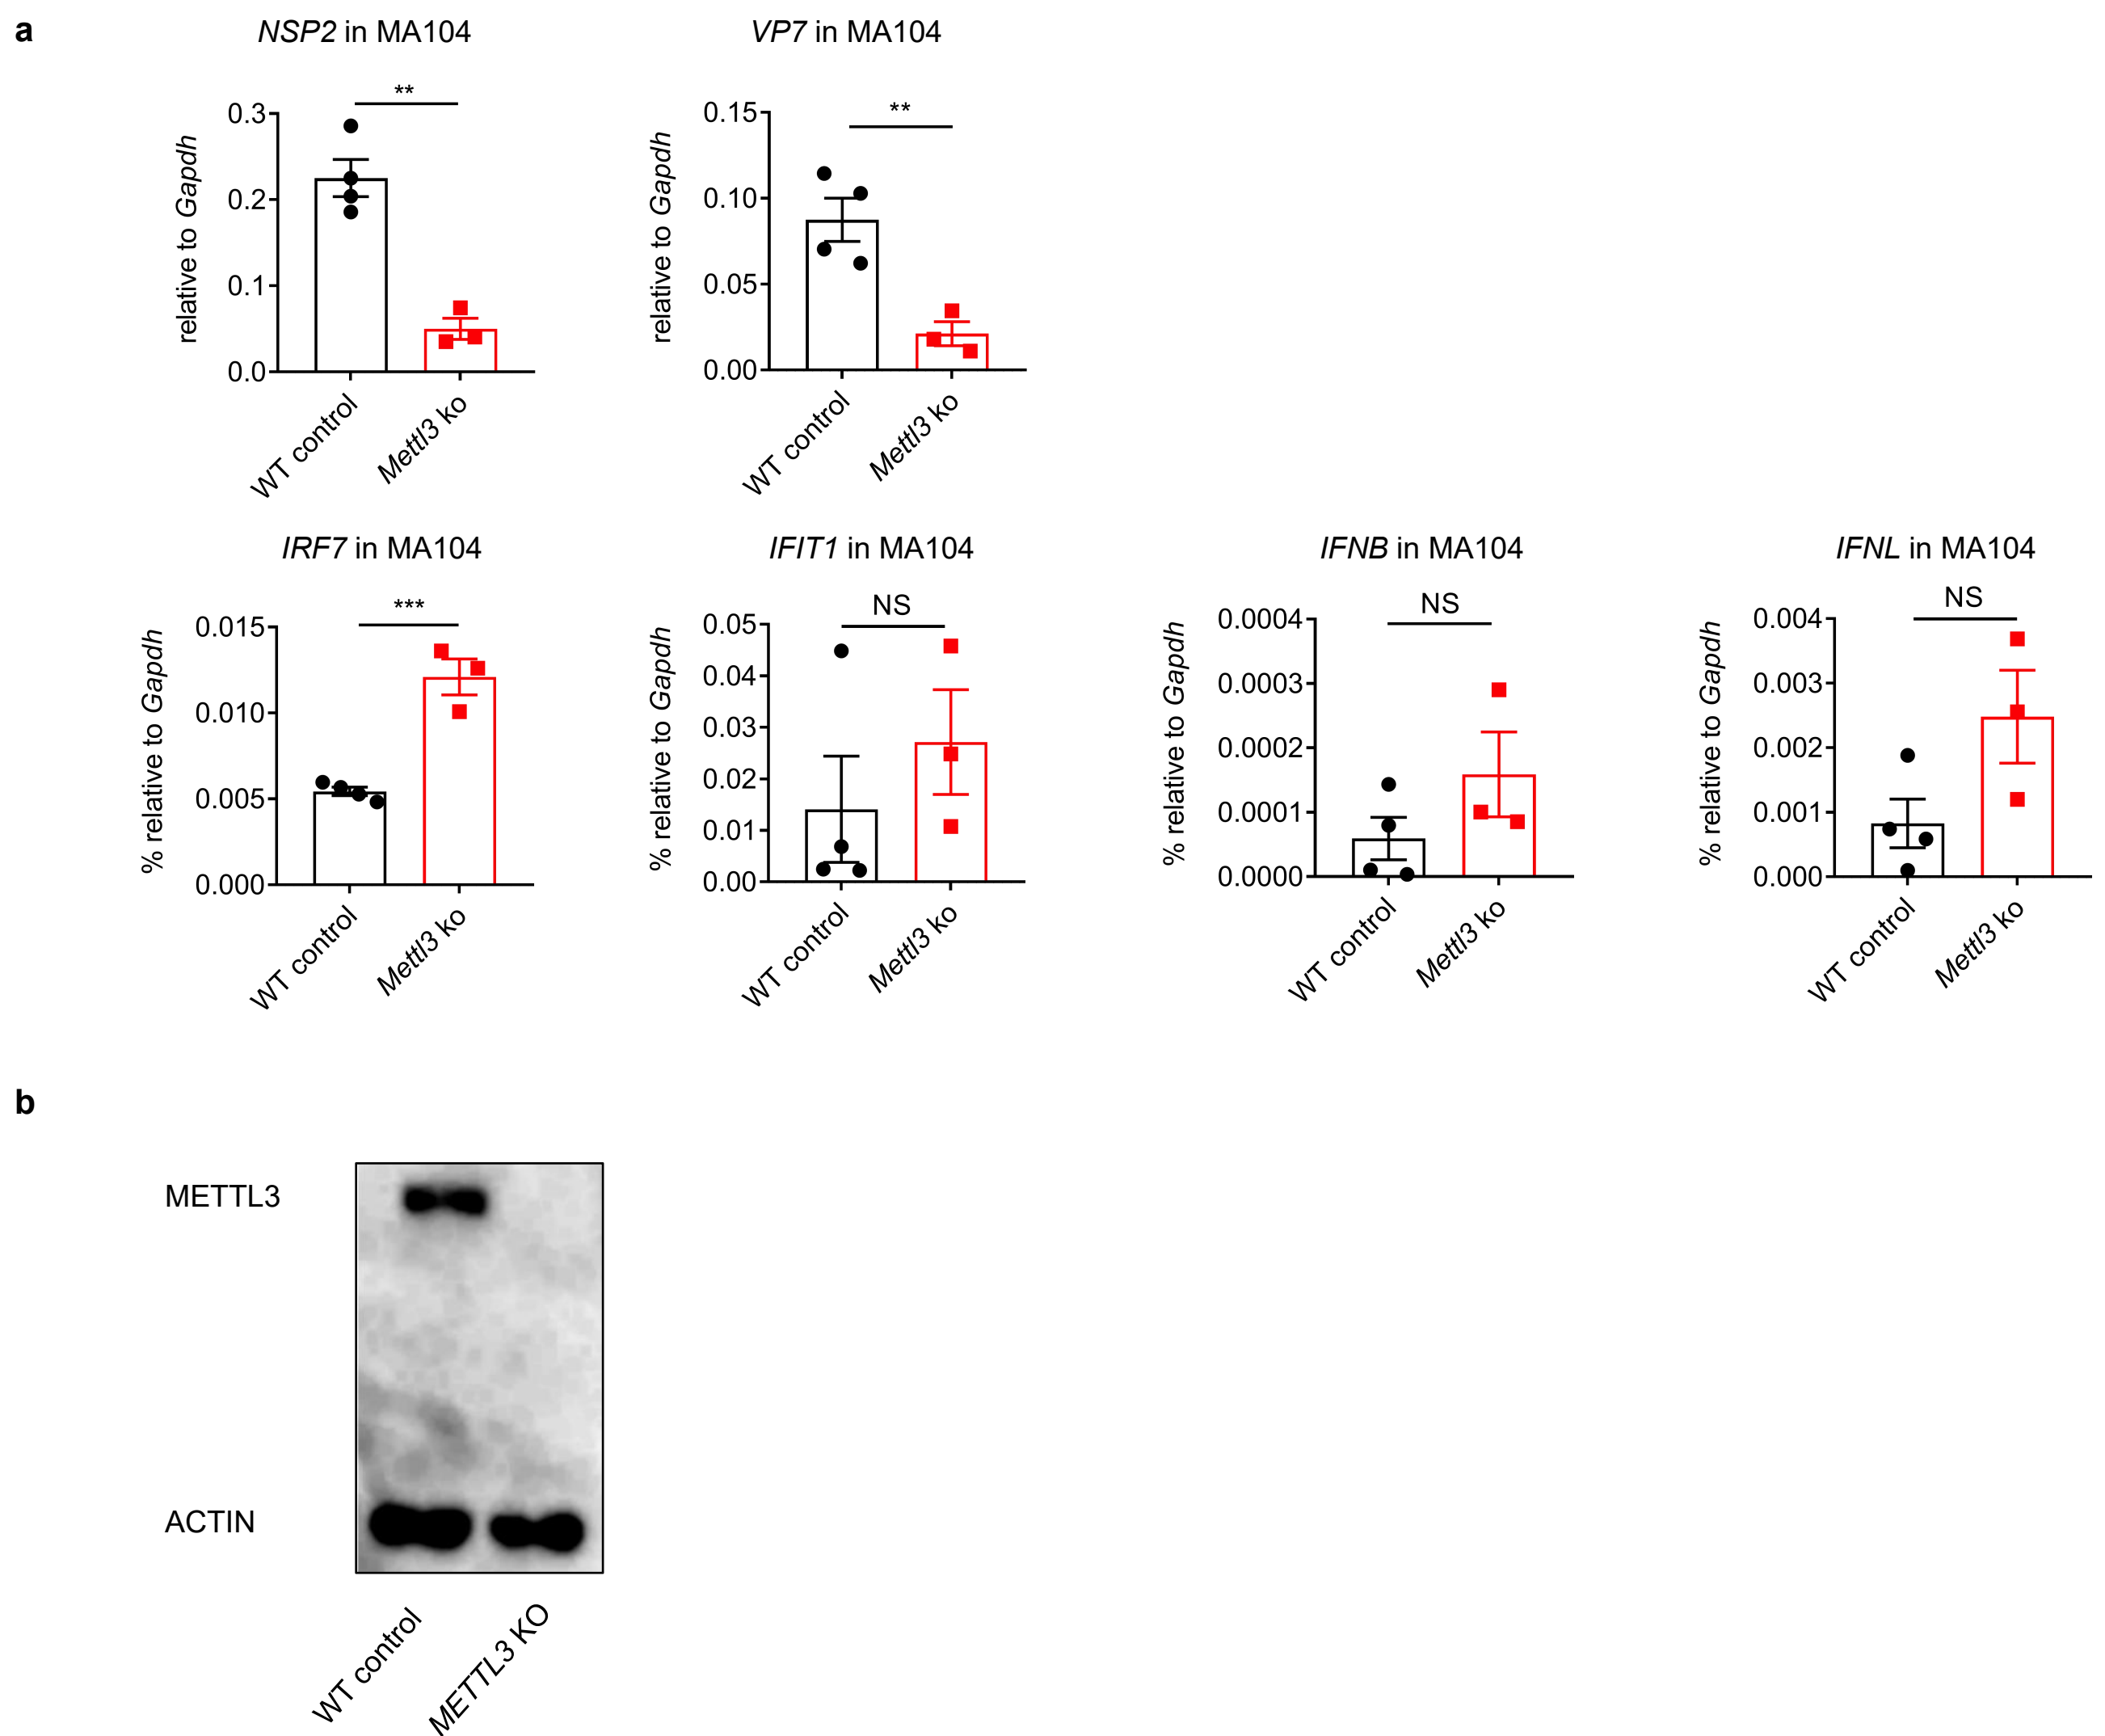

**Figure 2-figure supplement 3. METTL3 deficiency in MA104 cells results in increased resistance to Rhesus rotavirus infection.**

**(a)** qPCR analysis of viral RNAs, IFNs, and ISGs in Rhesus rotavirus-infected *Mettl3* WT and KO MA104 cells at 24 hours post infection (hpi) (WT control n=4, *Mettl3* ko n=3, mean  $\pm$  SEM), statistical significance was determined by Student's t-test (\*\*P < 0.005, \*\*\*P < 0.001, NS., not significant).

**(b)** Knock out efficiency of *METTL3* in MA104 cells.

Experiments in **(a and b)** are repeated three times.
