# Supplementary material for: m6A modifications regulate intestinal immunity and rotavirus infection
Source: eLife journal article supplement (doi:10.7554/elife.73628), 2022-01-31
Supplement: supp [file elife-73628-supp-v1.zip]

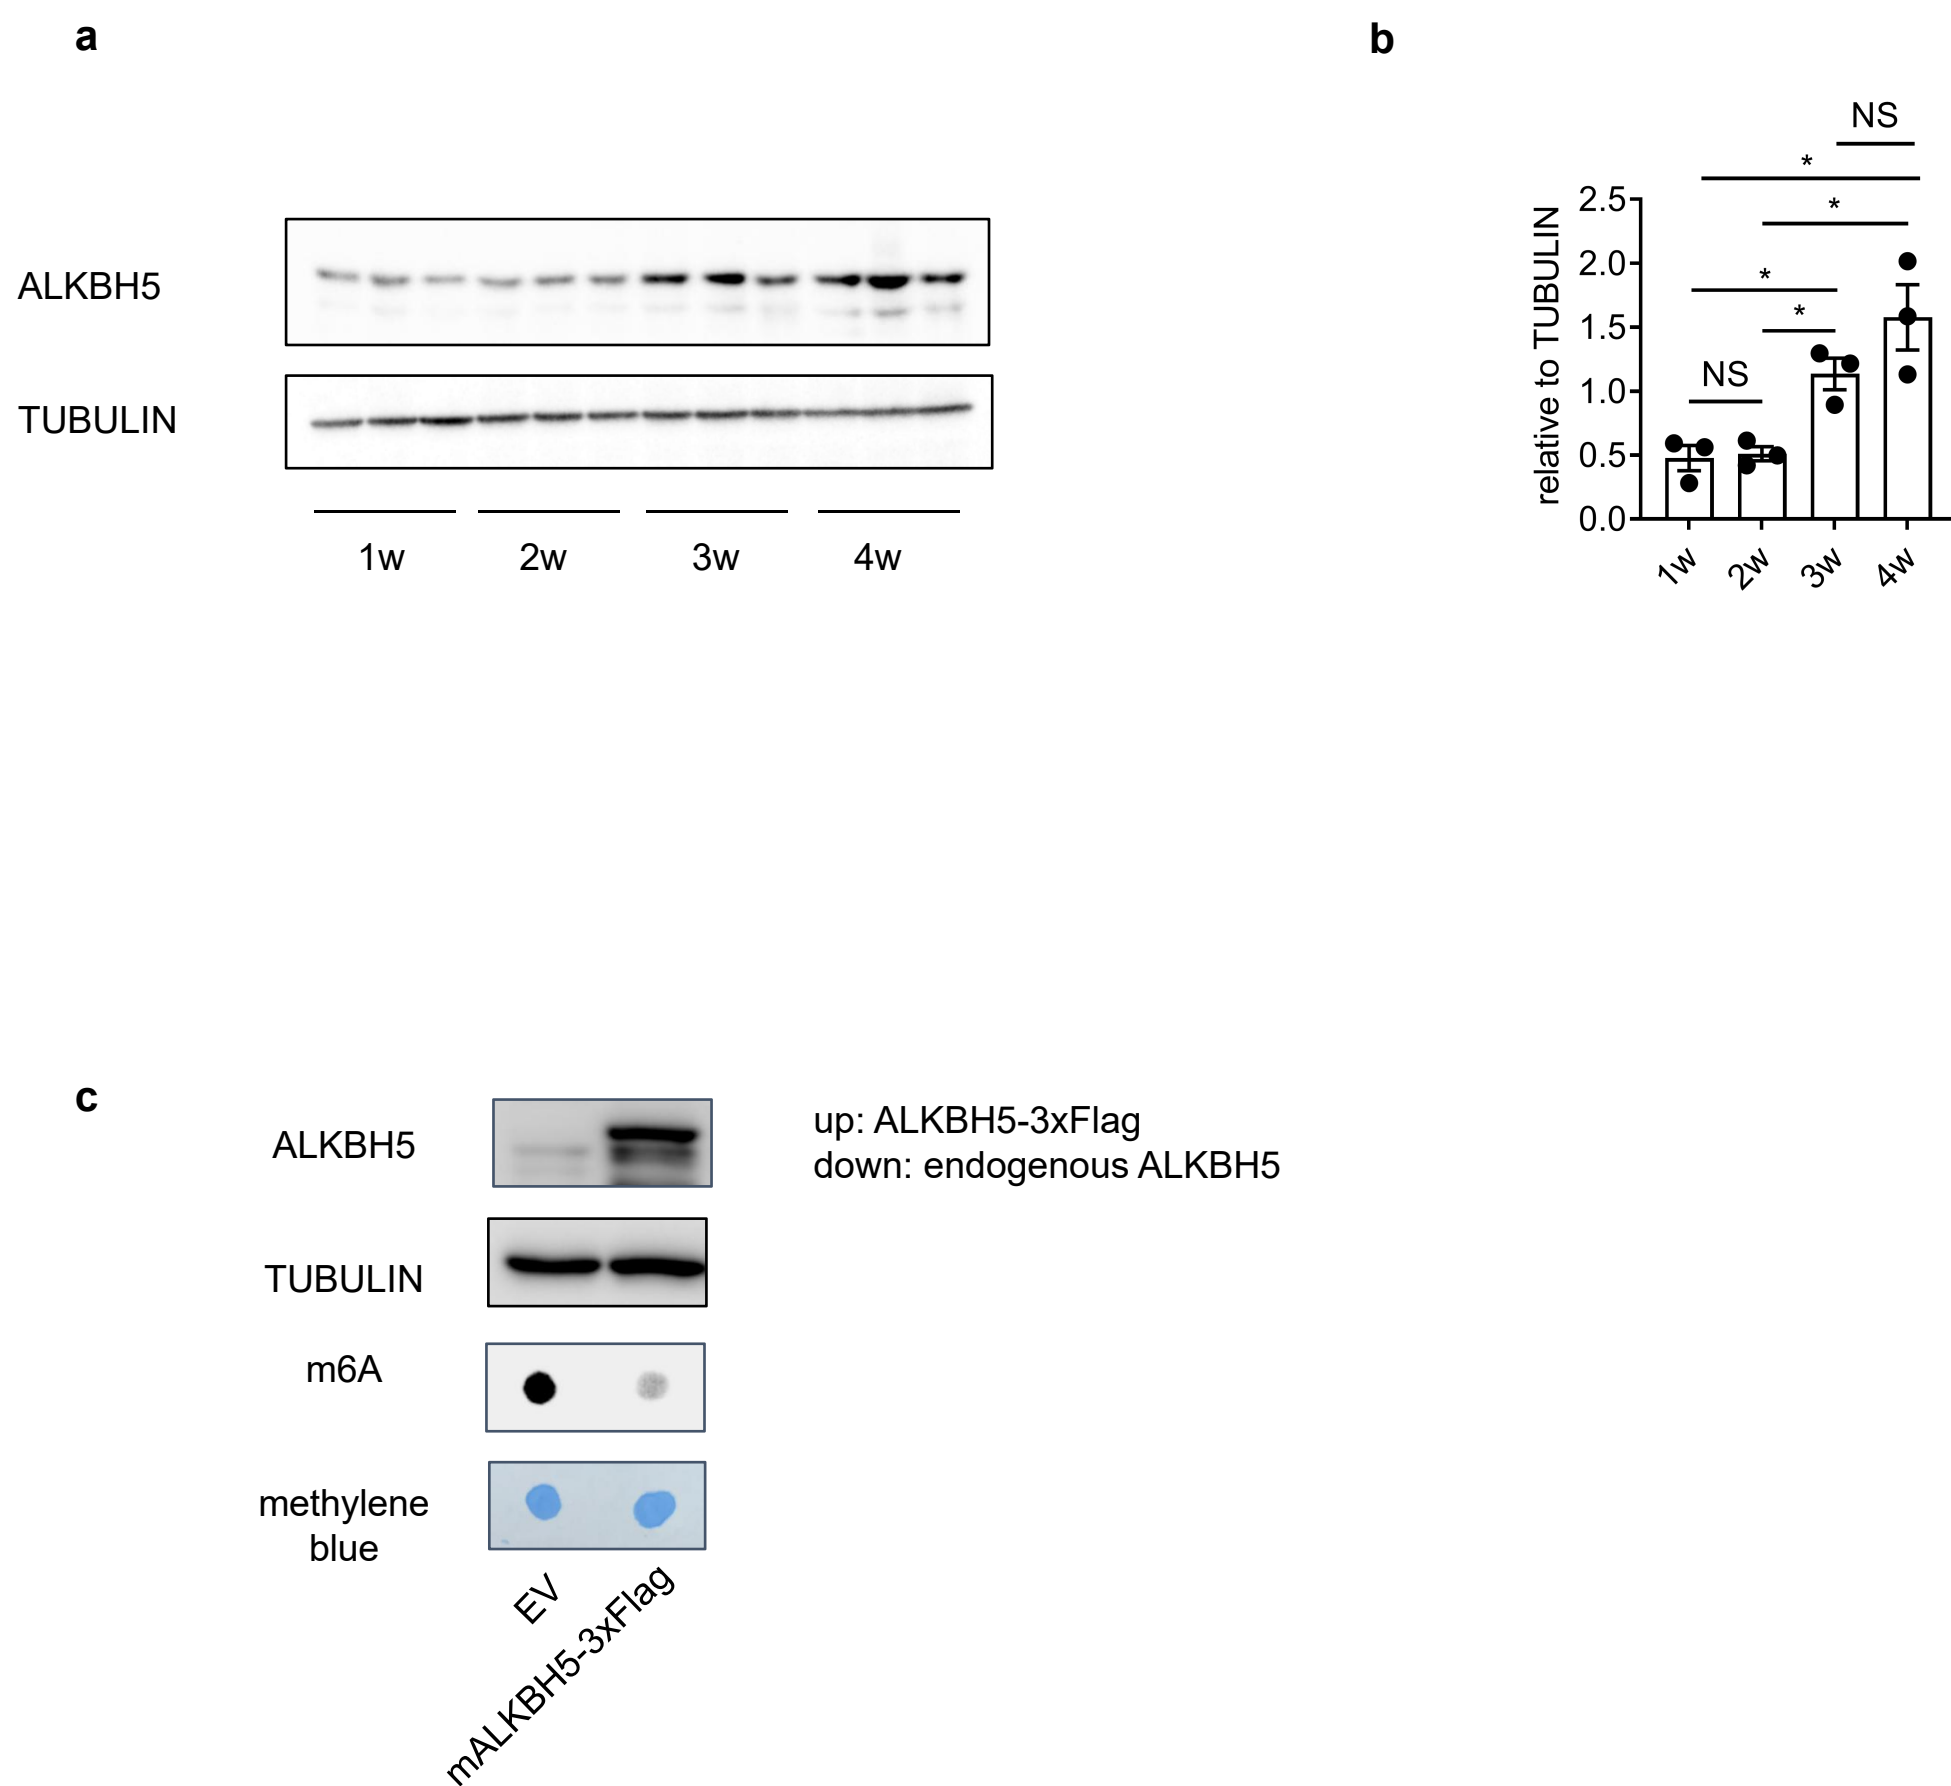

**Figure 1-figure supplement 1. ALKBH5 regulates total RNA m6A modification level in intestine.**

(a) Immunoblotting with antibodies target ALKBH5 and TUBULIN in ileum tissues from mice with different ages.

(b) Quantitative analysis of (a) (mean  $\pm$  SEM), Statistical significance was determined by Student's t-test (\*P < 0.05, NS., not significant).

(c) Immunoblotting with antibodies target ALKBH5 and TUBULIN in MODE-K cells transfected with pSIN-EV or pSIN-mAlkbh5-3xFlag for 24h. m6A dot blot analysis of total RNA in indicated samples. Methylene blue (MB) staining was the loading control. Experiments in (a and b) are repeated twice, (c) are repeated three times.
