# Supplementary material for: m6A modifications regulate intestinal immunity and rotavirus infection
Source: eLife journal article supplement (doi:10.7554/elife.73628), 2022-01-31
Supplement: supp [file elife-73628-supp-v1.zip]

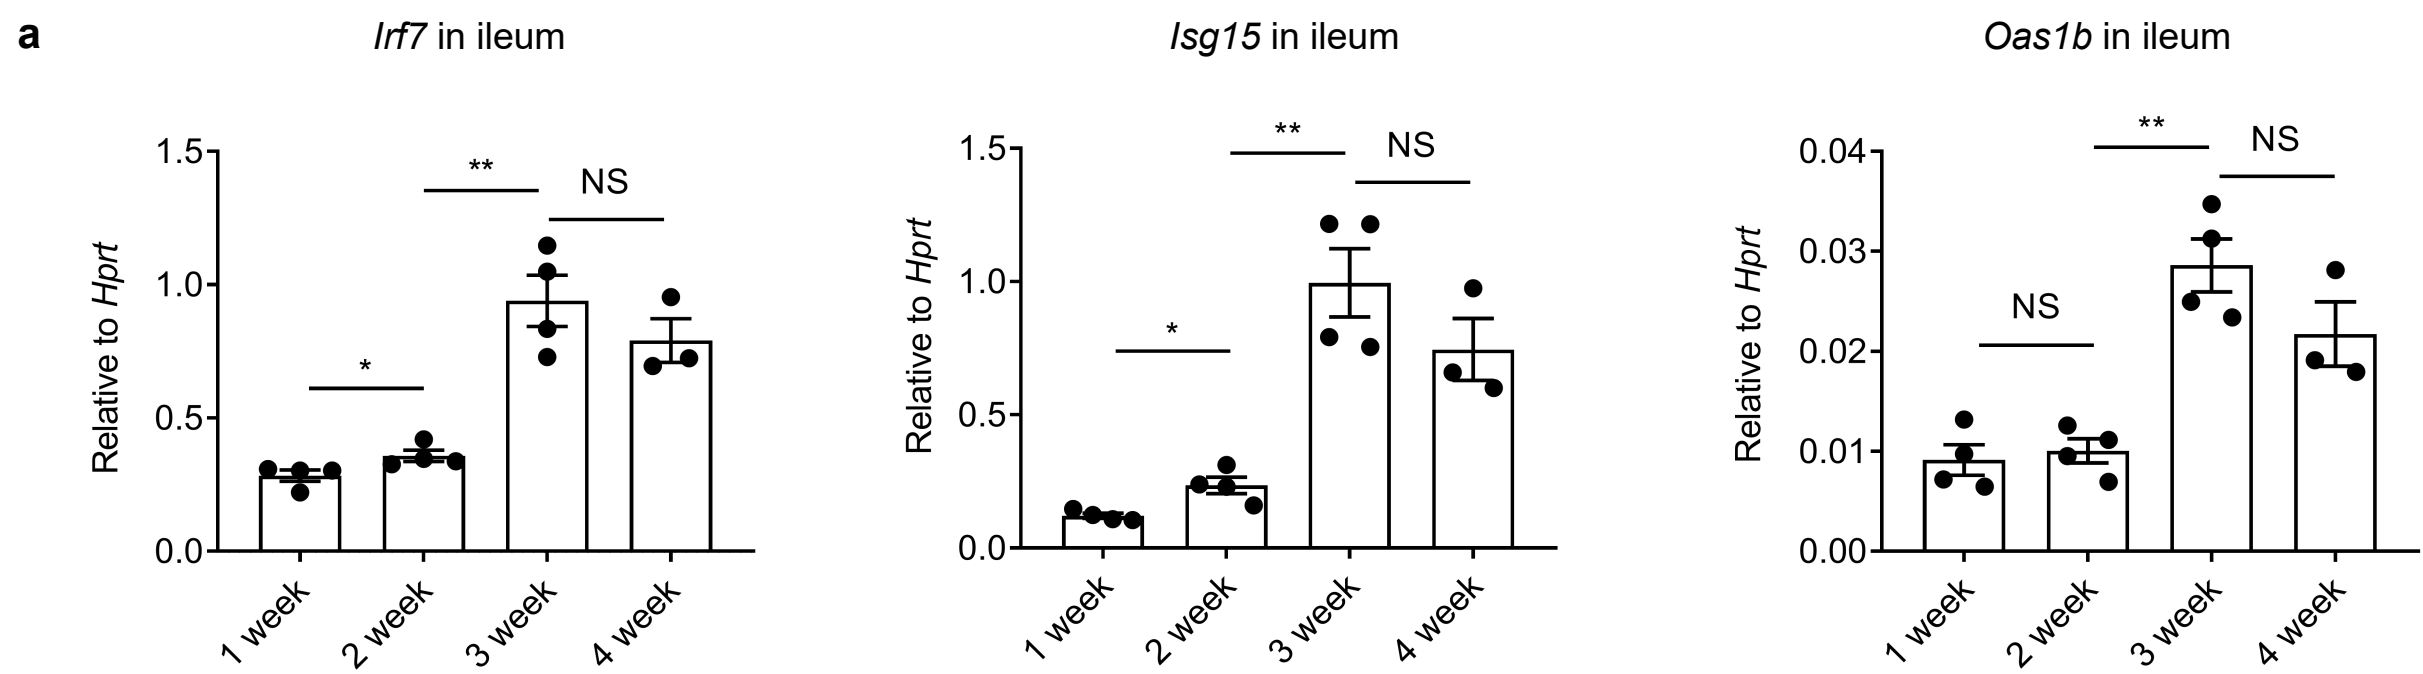

**Figure 2-figure supplement 5. Expression of *Irf7* and *ISGs* in ileum from mice during early life development.**

(a) qPCR analysis of indicated genes in the ileum (mean  $\pm$  SEM). Statistical significance was determined by Student's t-tests between ages (\*P < 0.05, \*\*P < 0.005, NS., not significant).

Experiments in (a) are repeated twice.
