# Supplementary material for: m6A modifications regulate intestinal immunity and rotavirus infection
Source: eLife journal article supplement (doi:10.7554/elife.73628), 2022-01-31
Supplement: supp [file elife-73628-supp-v1.zip]

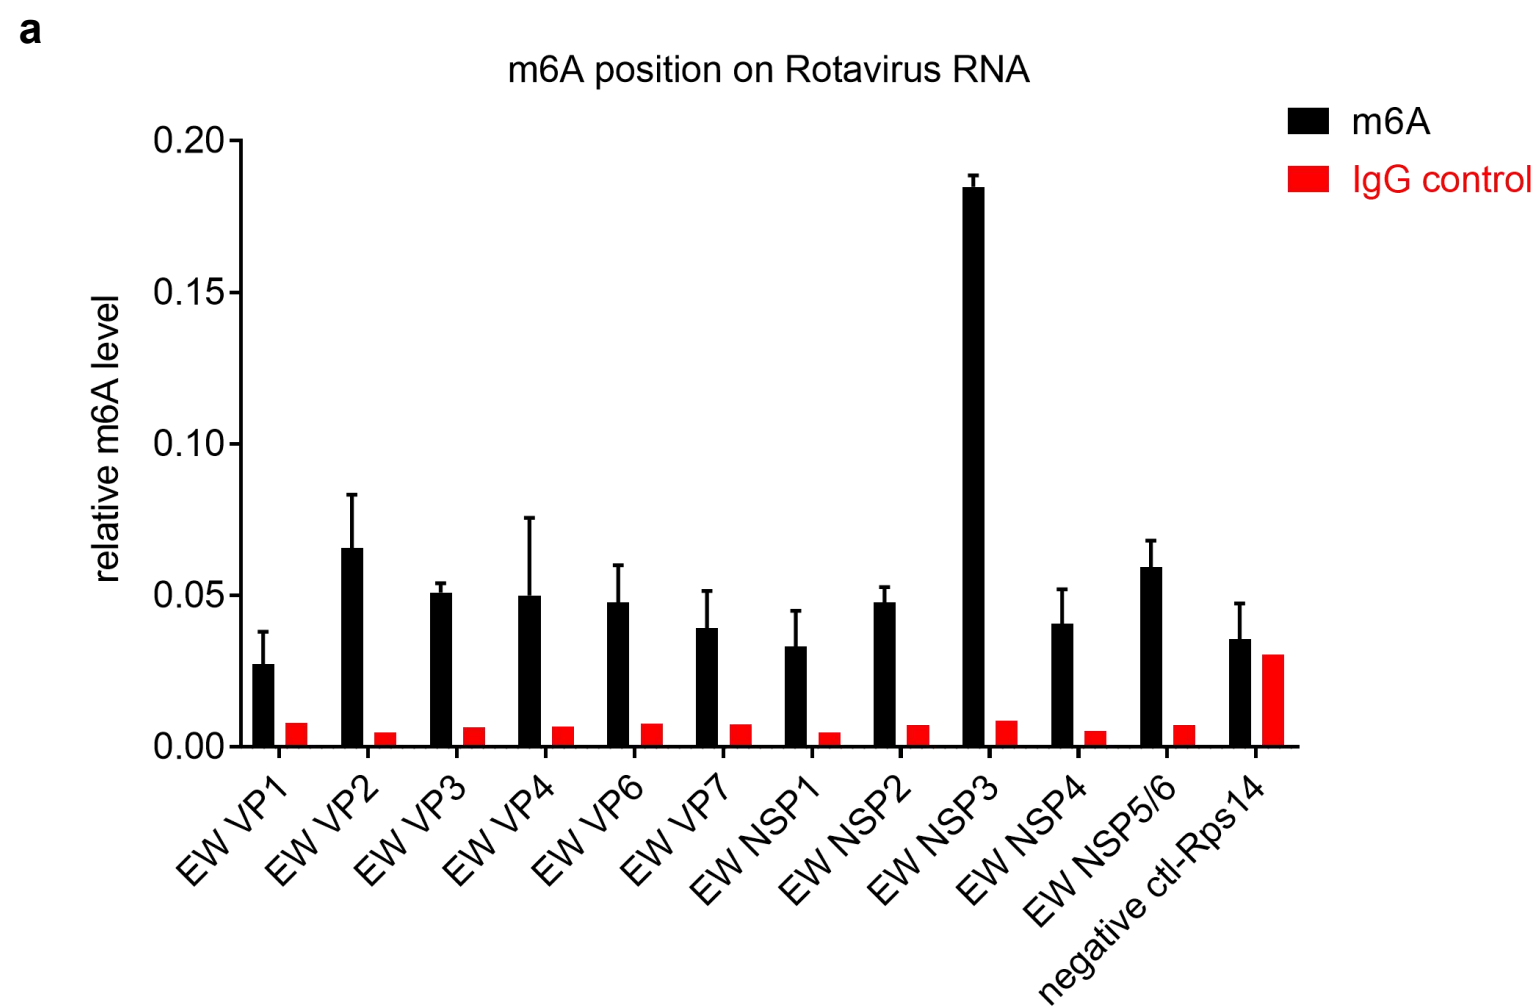

**Figure 4-figure supplement 3. m6A-RIP-qPCR analysis of the predicted m6A sites on Rotavirus RNA.**

(a) Total RNA was extracted from IECs from 1-week-old WT mice infected by RV for 2 days. Fragmented RNA was incubated with an anti-m6A antibody (Sigma Aldrich ABE572) and IgG IP Grade Rabbit polyclonal antibody (abcam, lot: 934197). The eluted RNA and input were processed as described in 'RT-qPCR' section, the data were normalized to the input samples (n=2, mean  $\pm$  SEM), Rps14 was chosen as a negative control.
