# Supplementary material for: m6A modifications regulate intestinal immunity and rotavirus infection
Source: eLife journal article supplement (doi:10.7554/elife.73628), 2022-01-31
Supplement: supp [file elife-73628-supp-v1.zip]

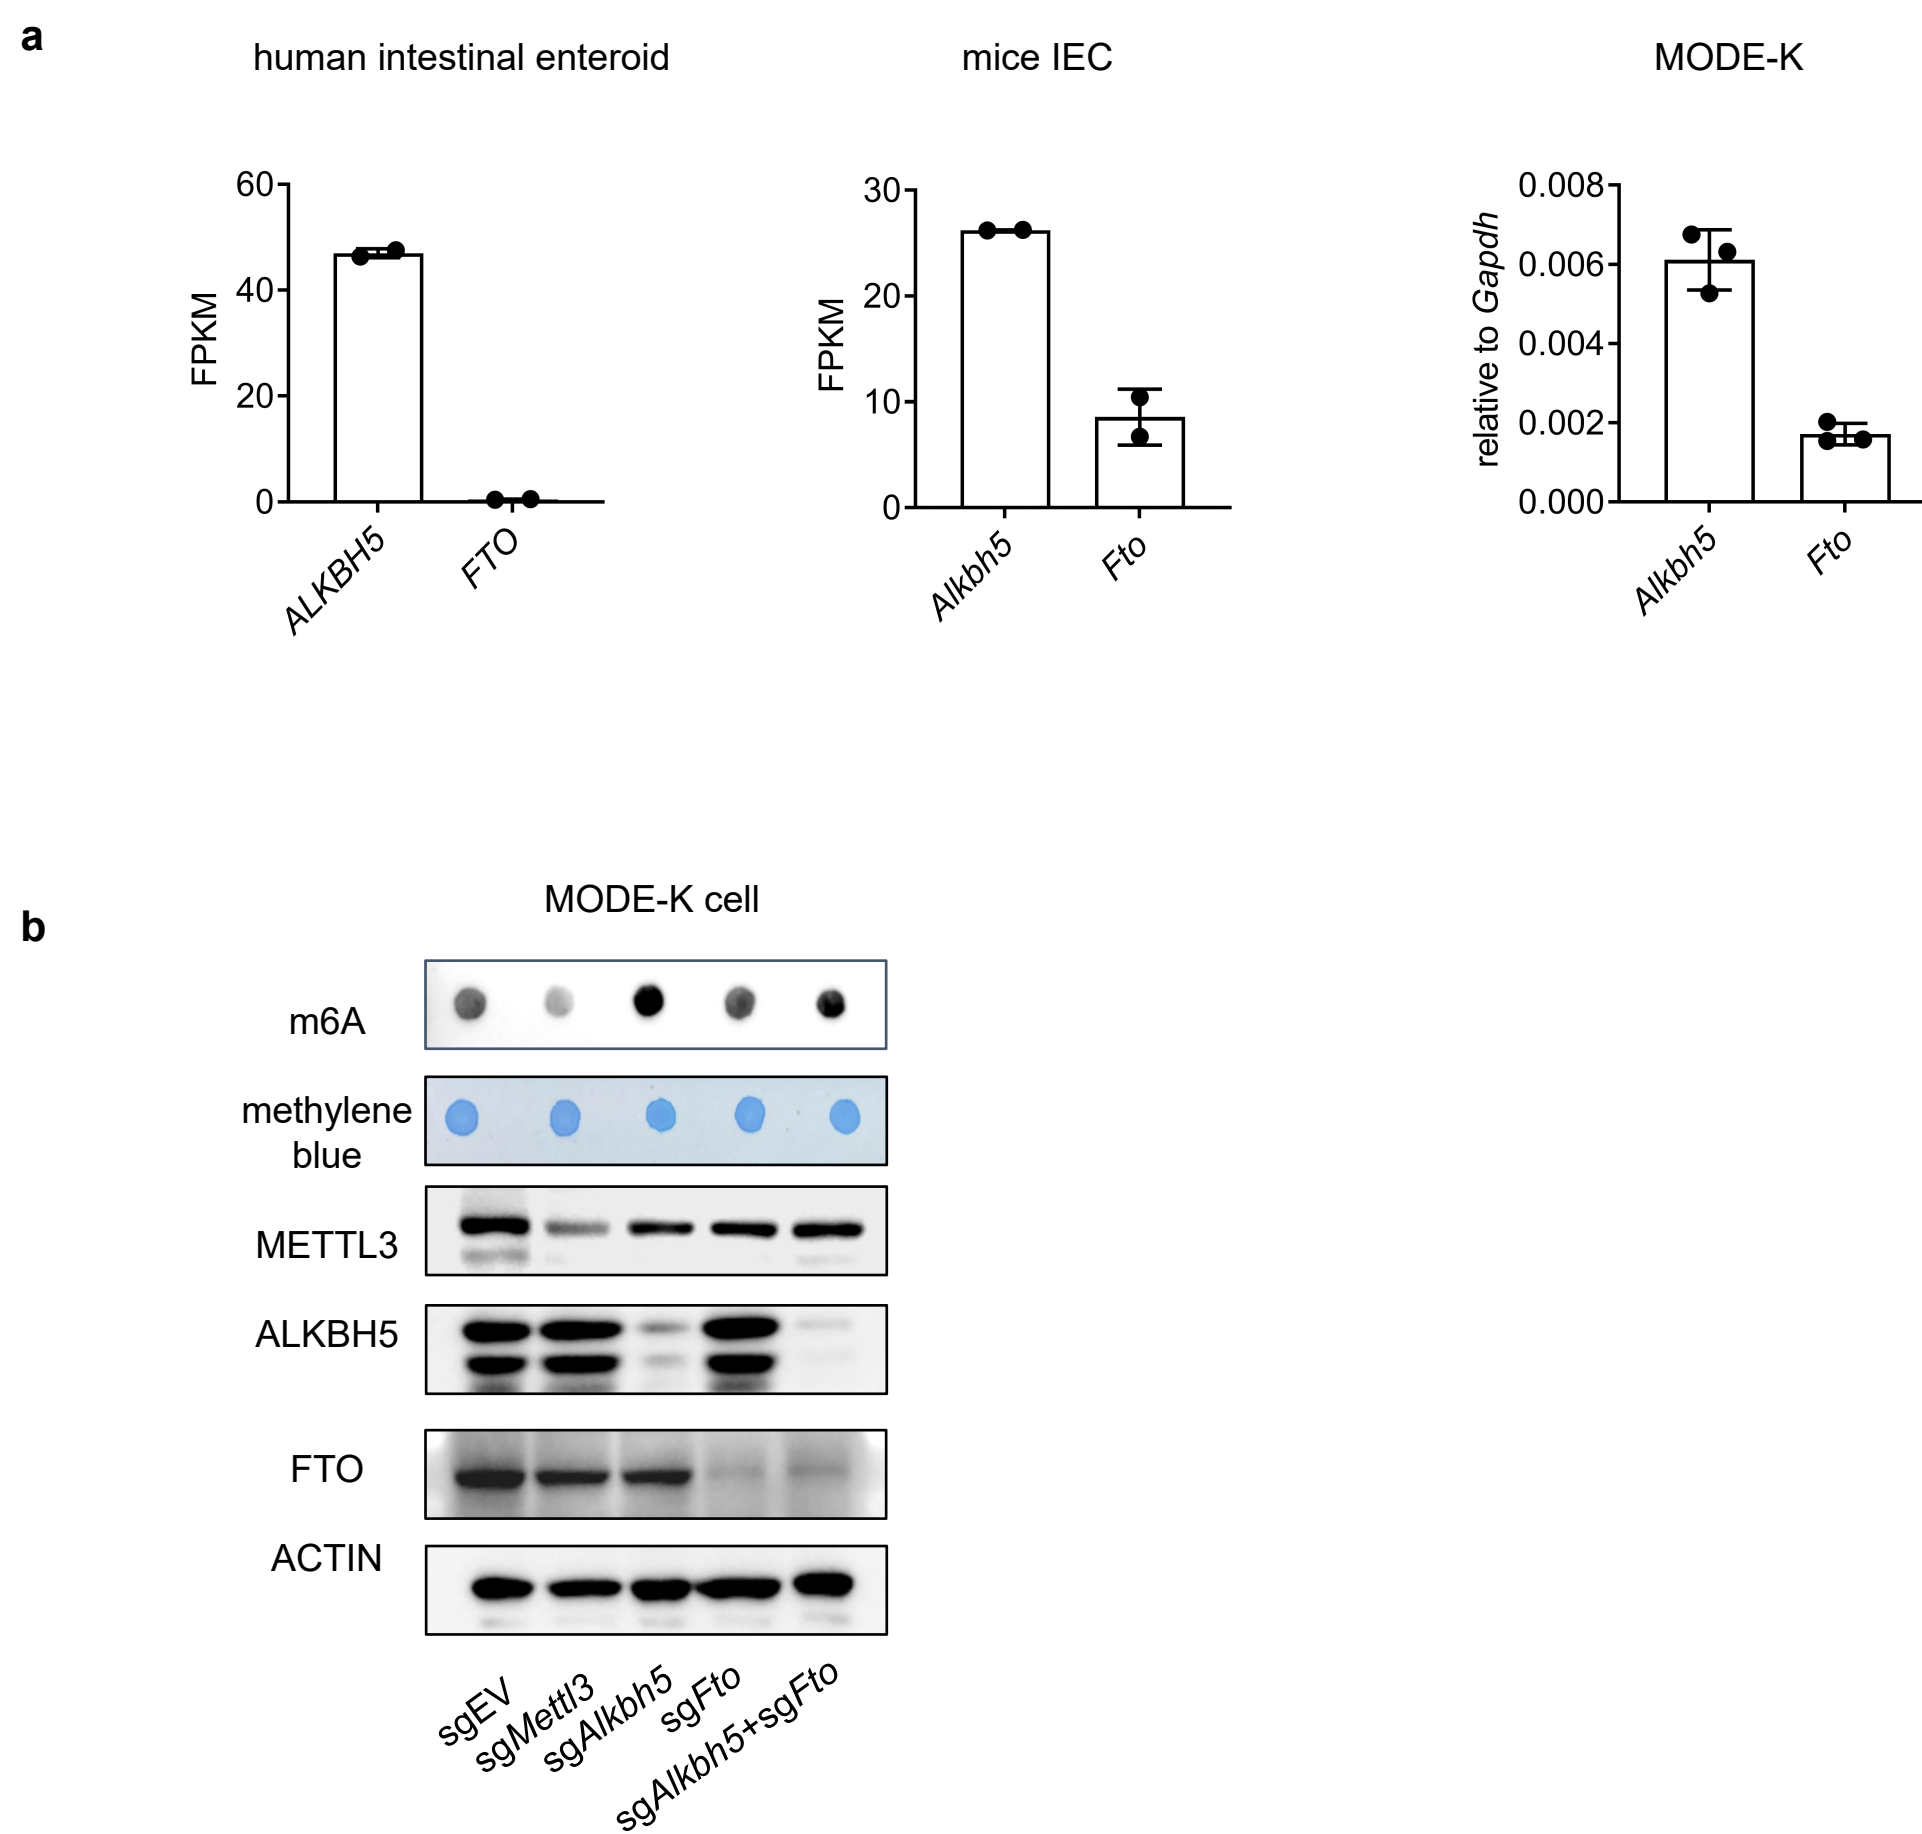

**Figure 4-figure supplement 1. A non-redundant role of *Alkbh5* in regulating m6A modification in IECs.**

(a) Relative expression level of *ALKBH5/Alkbh5* and *FTO/Fto* in human intestinal enteroid, mice IEC and mice IEC cell MODE-K.

(b) m6A dot blot analysis of total RNA in different MODE-K cells. Methylene blue (MB) staining was the loading control.

Experiments in (b) are repeated twice.
