# Supplementary material for: m6A modifications regulate intestinal immunity and rotavirus infection
Source: eLife journal article supplement (doi:10.7554/elife.73628), 2022-01-31
Supplement: supp [file elife-73628-supp-v1.zip]

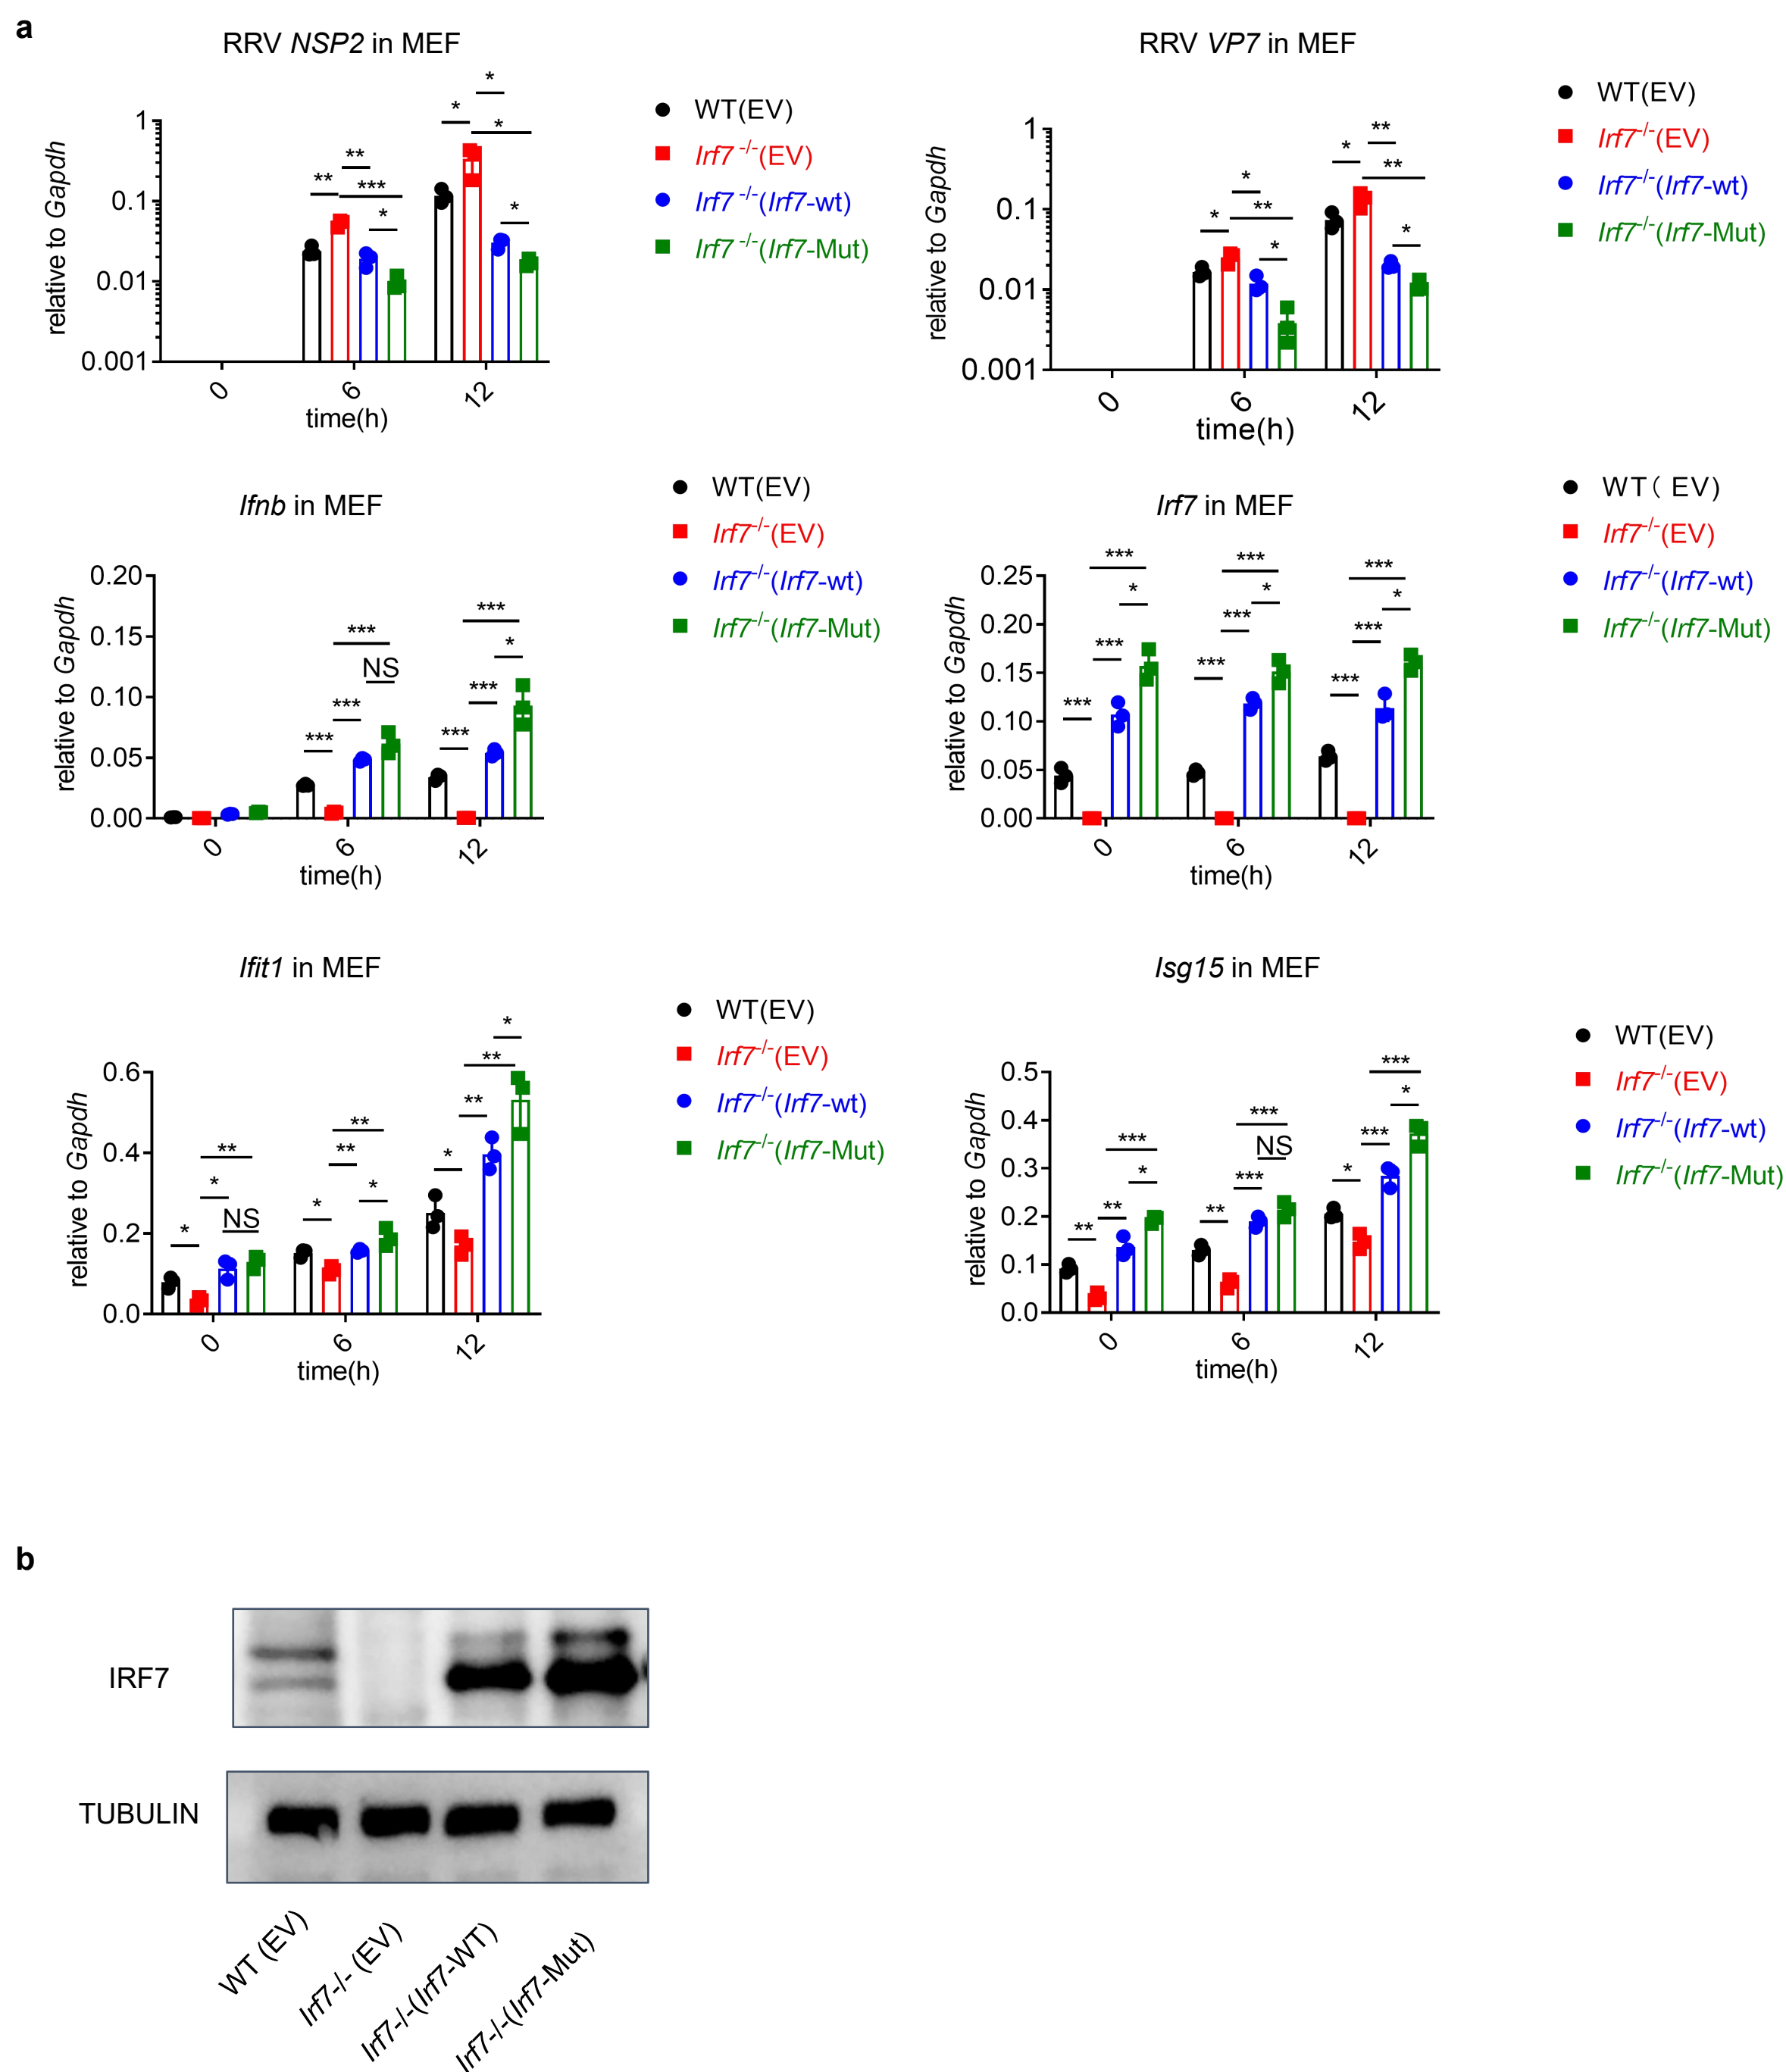

**Figure 2-figure supplement 4. m6A modification on *Irf7* mRNA regulates its expression.**

(a) WT and *Irf7*<sup>-/-</sup> MEF cell were transduced with lentivirus expressing pLVX-EV-puro, pLVX-*Irf7*-WT-puro or pLVX-*Irf7*-Mut-puro containing mutated m6A modification sites. qPCR analysis of genes in different cells at indicated hours post infection (hpi) (mean  $\pm$  SEM). Statistical significance was determined by Student's t-tests between groups (\*P < 0.05, \*\*P < 0.005, \*\*\*P < 0.001, NS., not significant).

(b) Western blot analysis of IRF7 expression level in different MEF cells.

Experiments in (a and b) are repeated three times.
