# Supplementary material for: m6A modifications regulate intestinal immunity and rotavirus infection
Source: eLife journal article supplement (doi:10.7554/elife.73628), 2022-01-31
Supplement: supp [file elife-73628-supp-v1.zip]

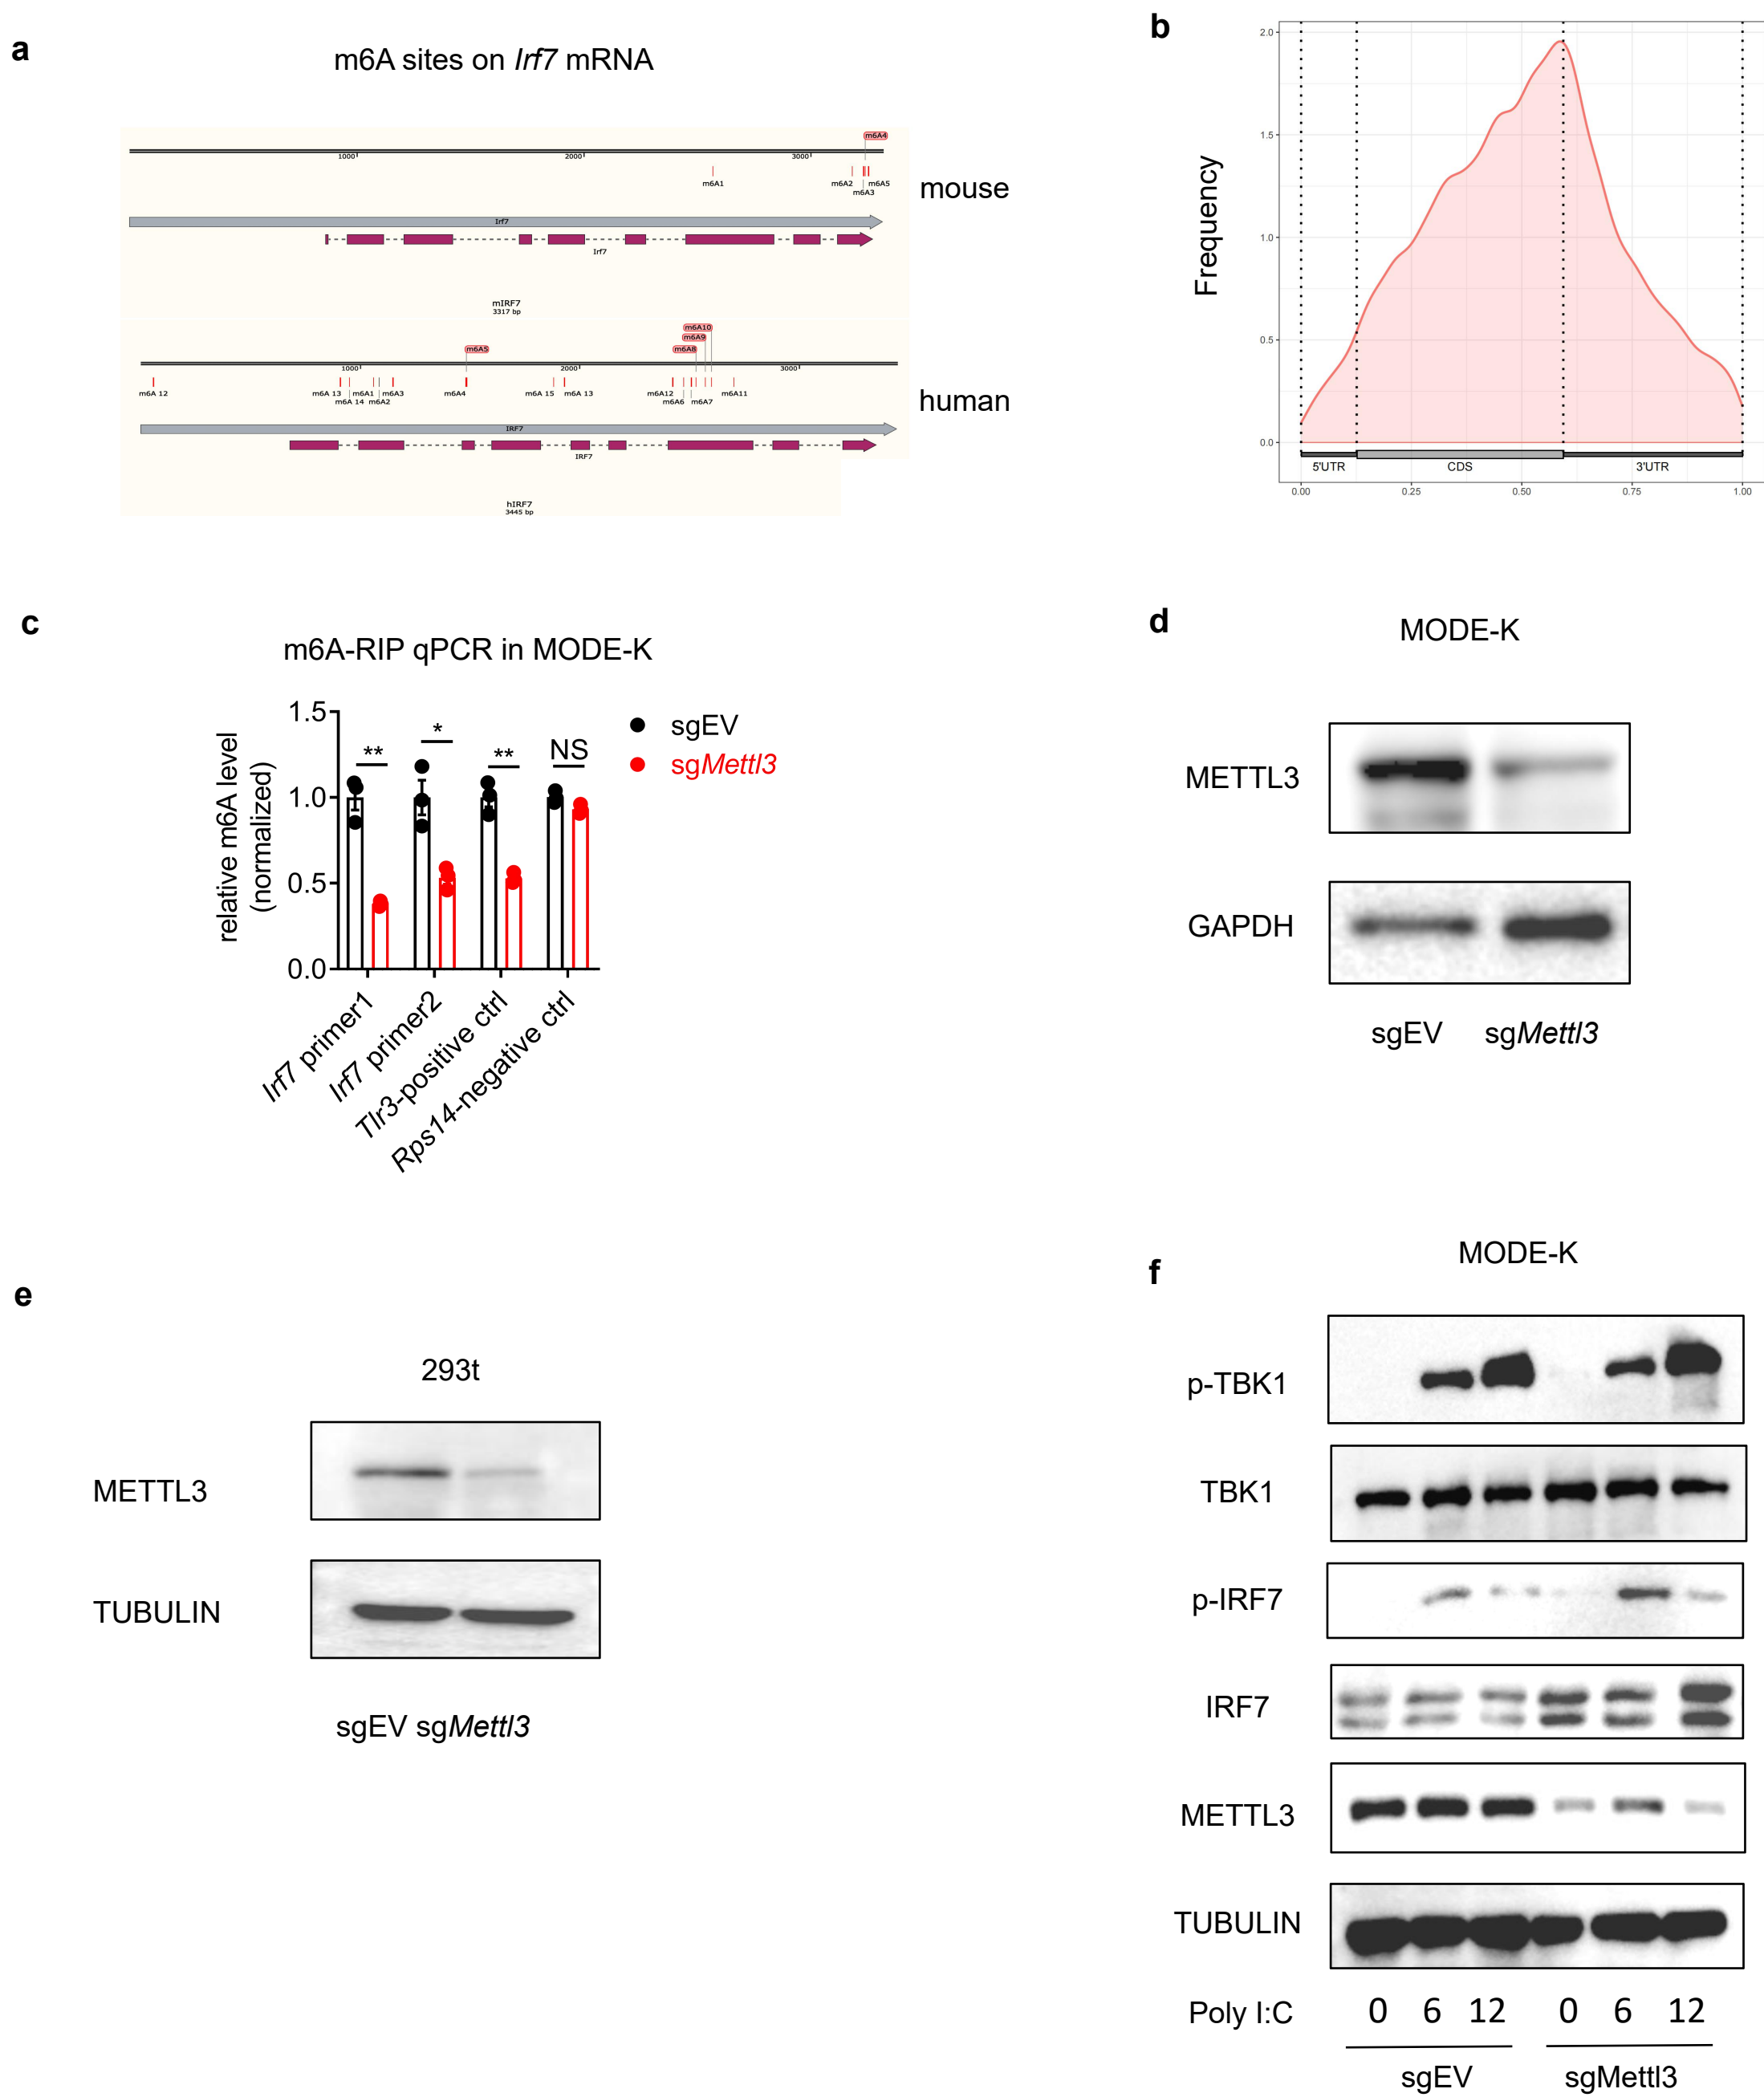

**Figure 2-figure supplement 1. Characterization of m6A modifications on *Irf7* mRNA.**

(a) Putative m6A sites of mouse or human *Irf7/IRF7* on the genomes.

(b) Metagene plots of m6A modified sites.

(c) m6A-RIP-qPCR confirms *Irf7* as an m6A-modified gene in IECs. RNA of sgEV and sg*Mettl3* MODE-K cells was incubated with an anti-m6A antibody (Sigma Aldrich, ABE572-I). The eluted RNA and input were processed as described in ‘RT-qPCR’ section, the data were normalized to the input samples (n=3, mean  $\pm$  SEM, Statistical significance was determined by Student’s t-test (\*P < 0.05, \*\*P < 0.005, NS., not significant). *Tlr3* and *Rps14* were measured with m6A sites specific qPCR primers as positive control and negative control, *Irf7* was measured with predicted m6A sites specific qPCR primer.

(d) Knock down efficiency of METTL3 in MODE-K cells.

(e) Knock down efficiency of METTL3 in 293t cells used for luciferase assay.

(f) Western blot analysis of sgEV and sg*Mettl3* MODE-K cells transfected with 2ug/ml poly I:C at indicated hours, at least three replicate experiments were performed.

Experiments in (c-f) are repeated twice.
