# Supplementary material for: m6A modifications regulate intestinal immunity and rotavirus infection
Source: eLife journal article supplement (doi:10.7554/elife.73628), 2022-01-31
Supplement: supp [file elife-73628-supp-v1.zip]

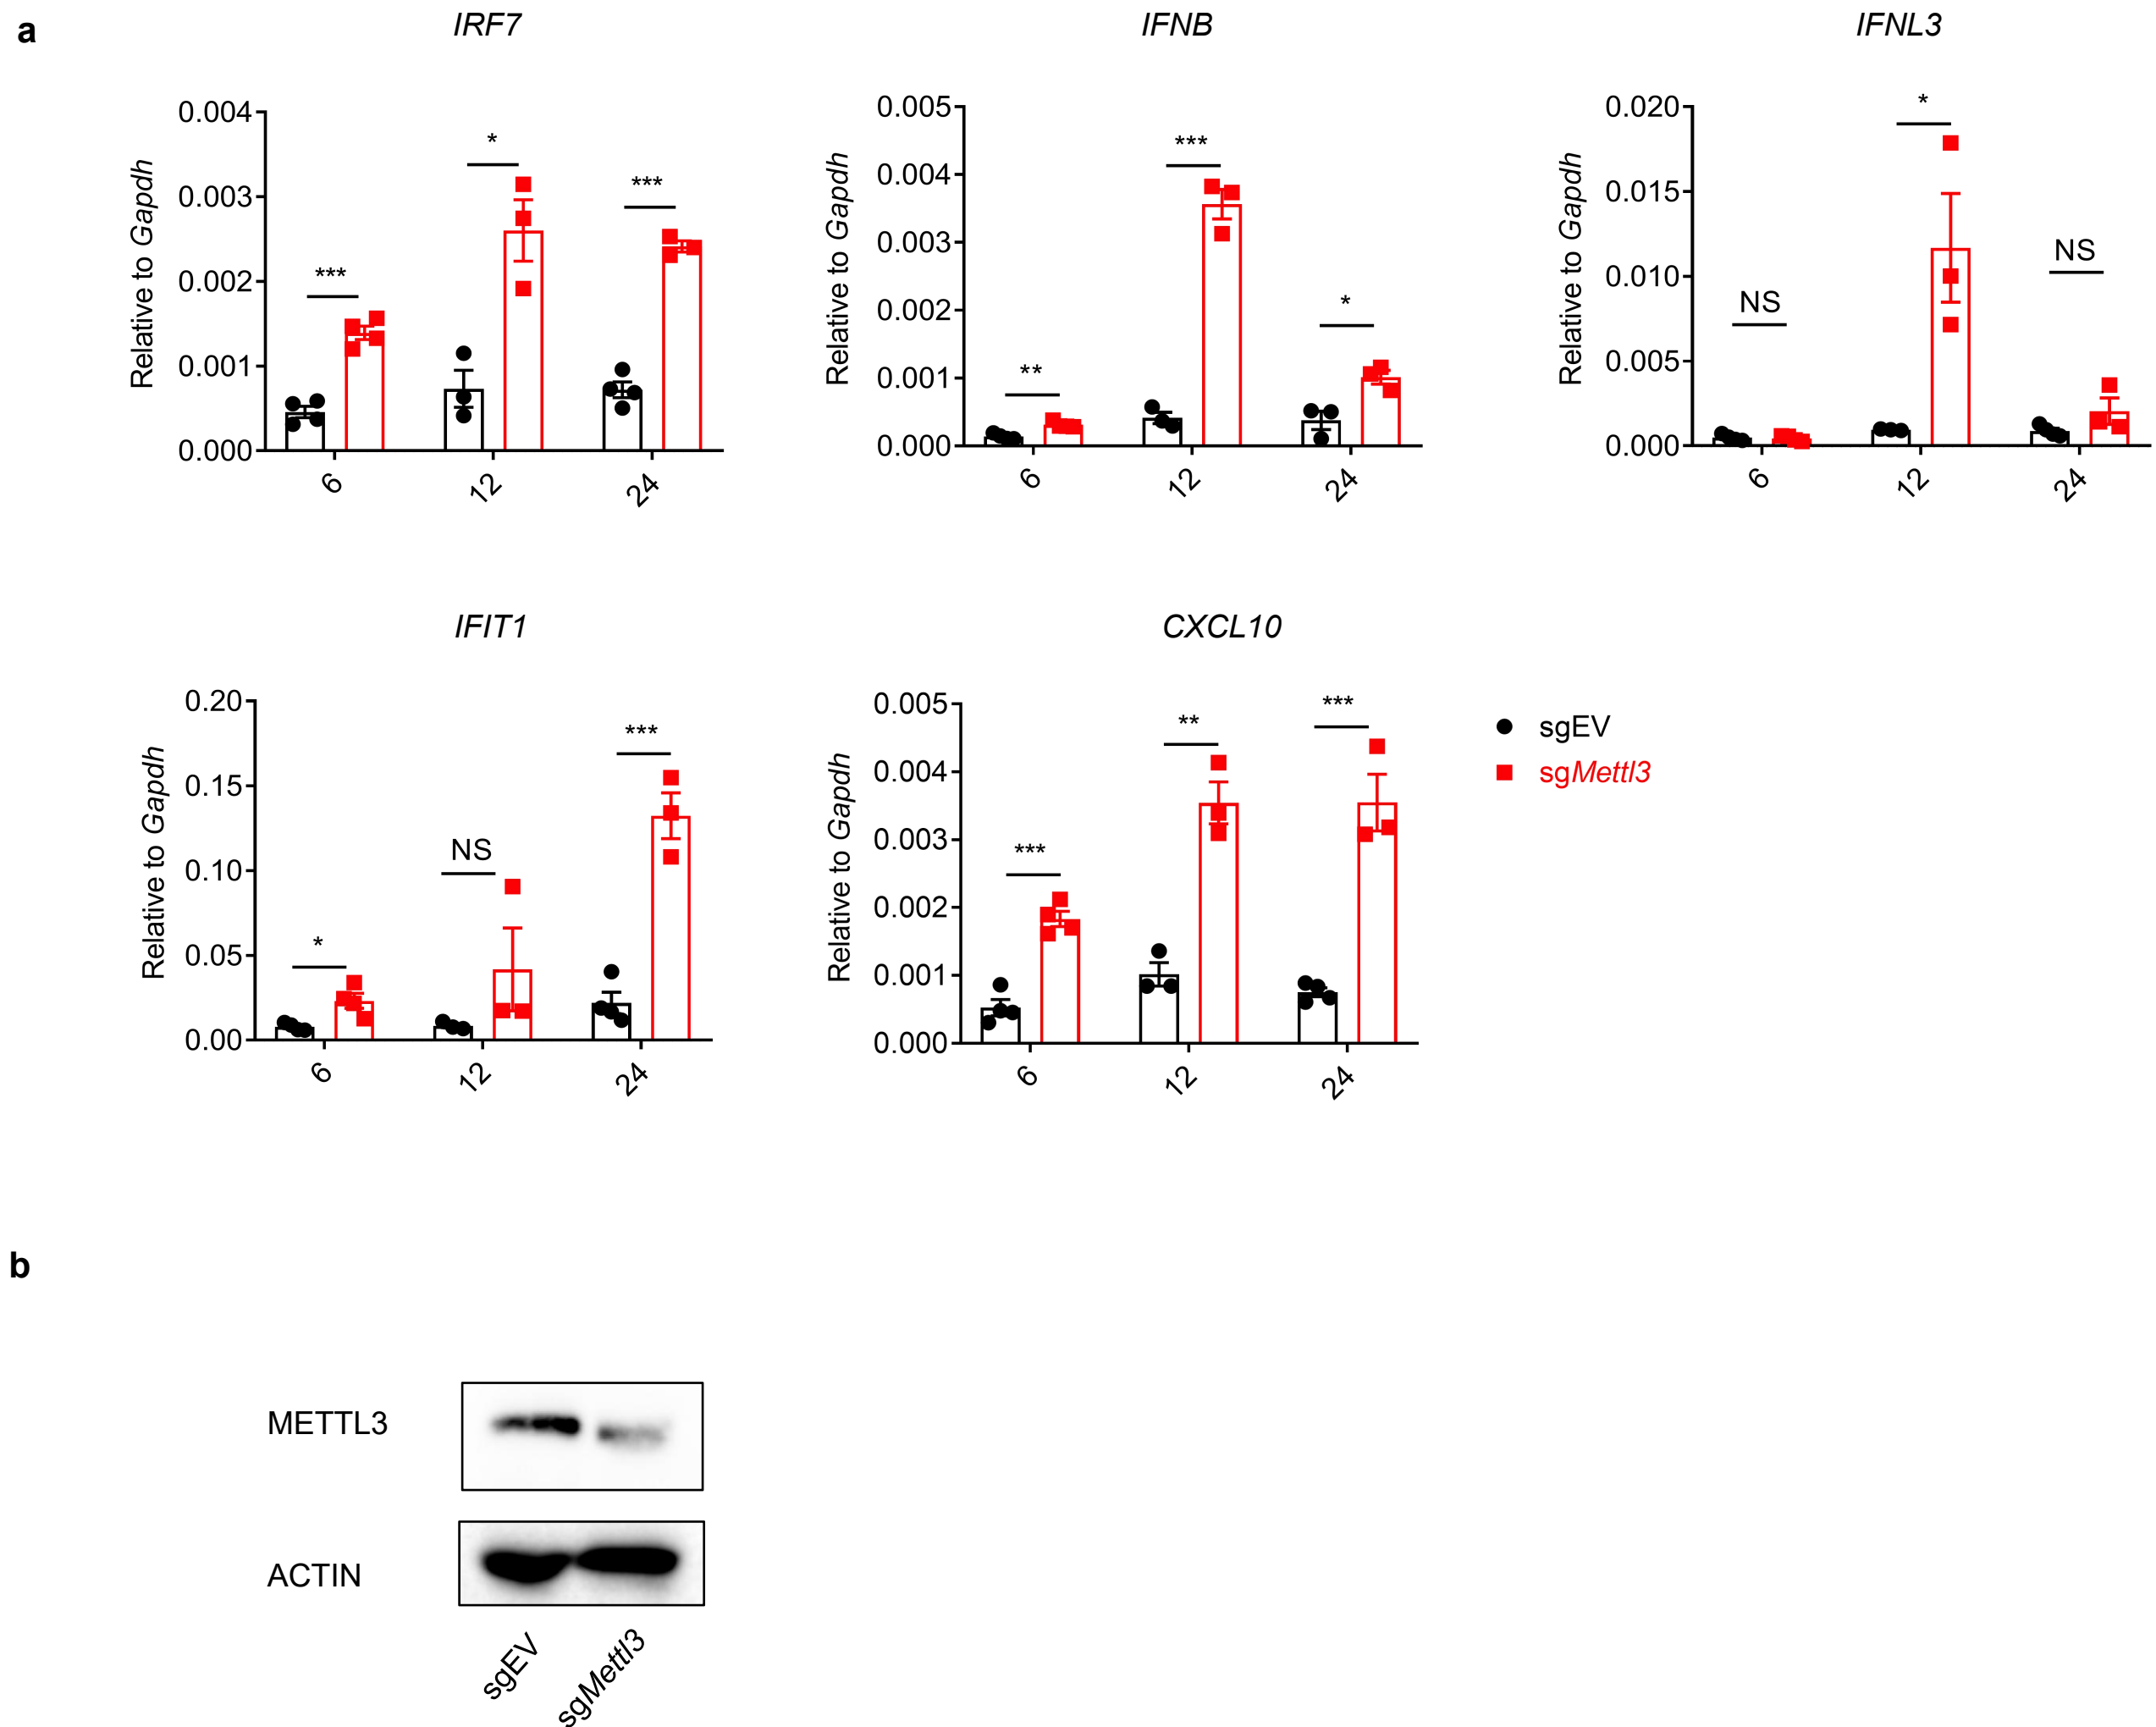

**Figure 2-figure supplement 2. METTL3 knockdown in HT-29 cells results in increased IFN response.**

(a) qPCR analysis of IFN/ISGs in Rhesus rotavirus-infected METTL3 WT and KD HT-29 cells at indicated hours post infection (hpi) (mean  $\pm$  SEM), statistical significance was determined by Student's t-test (\* $P$  < 0.05, \*\* $P$  < 0.005, \*\*\* $P$  < 0.001, NS., not significant).

(b) Knock down efficiency of *METTL3* in HT-29 cells.

Experiments in (a and b) are repeated three times.
