# Supplementary material for: m6A modifications regulate intestinal immunity and rotavirus infection
Source: eLife journal article supplement (doi:10.7554/elife.73628), 2022-01-31
Supplement: supp [file elife-73628-supp-v1.zip]

**a**

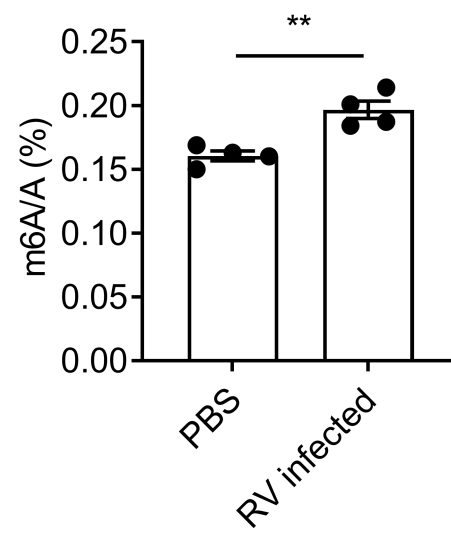

**Figure 1-figure supplement 3. Mass spectrum (MS) analysis of total RNA m6A modification level in RV infected ileum.**

**(a)** WT and *Mettl3* $\Delta$ IEC mice were infected by rotavirus EW strain at 8 days post birth. MS analysis of m6A level in ileum tissue from mice at 2 dpi (mean  $\pm$  SEM). Statistical significance was determined by Student's t-test (\*\*P < 0.005).
