# Supplementary material for: m6A modifications regulate intestinal immunity and rotavirus infection
Source: eLife journal article supplement (doi:10.7554/elife.73628), 2022-01-31
Supplement: supp [file elife-73628-supp-v1.zip]

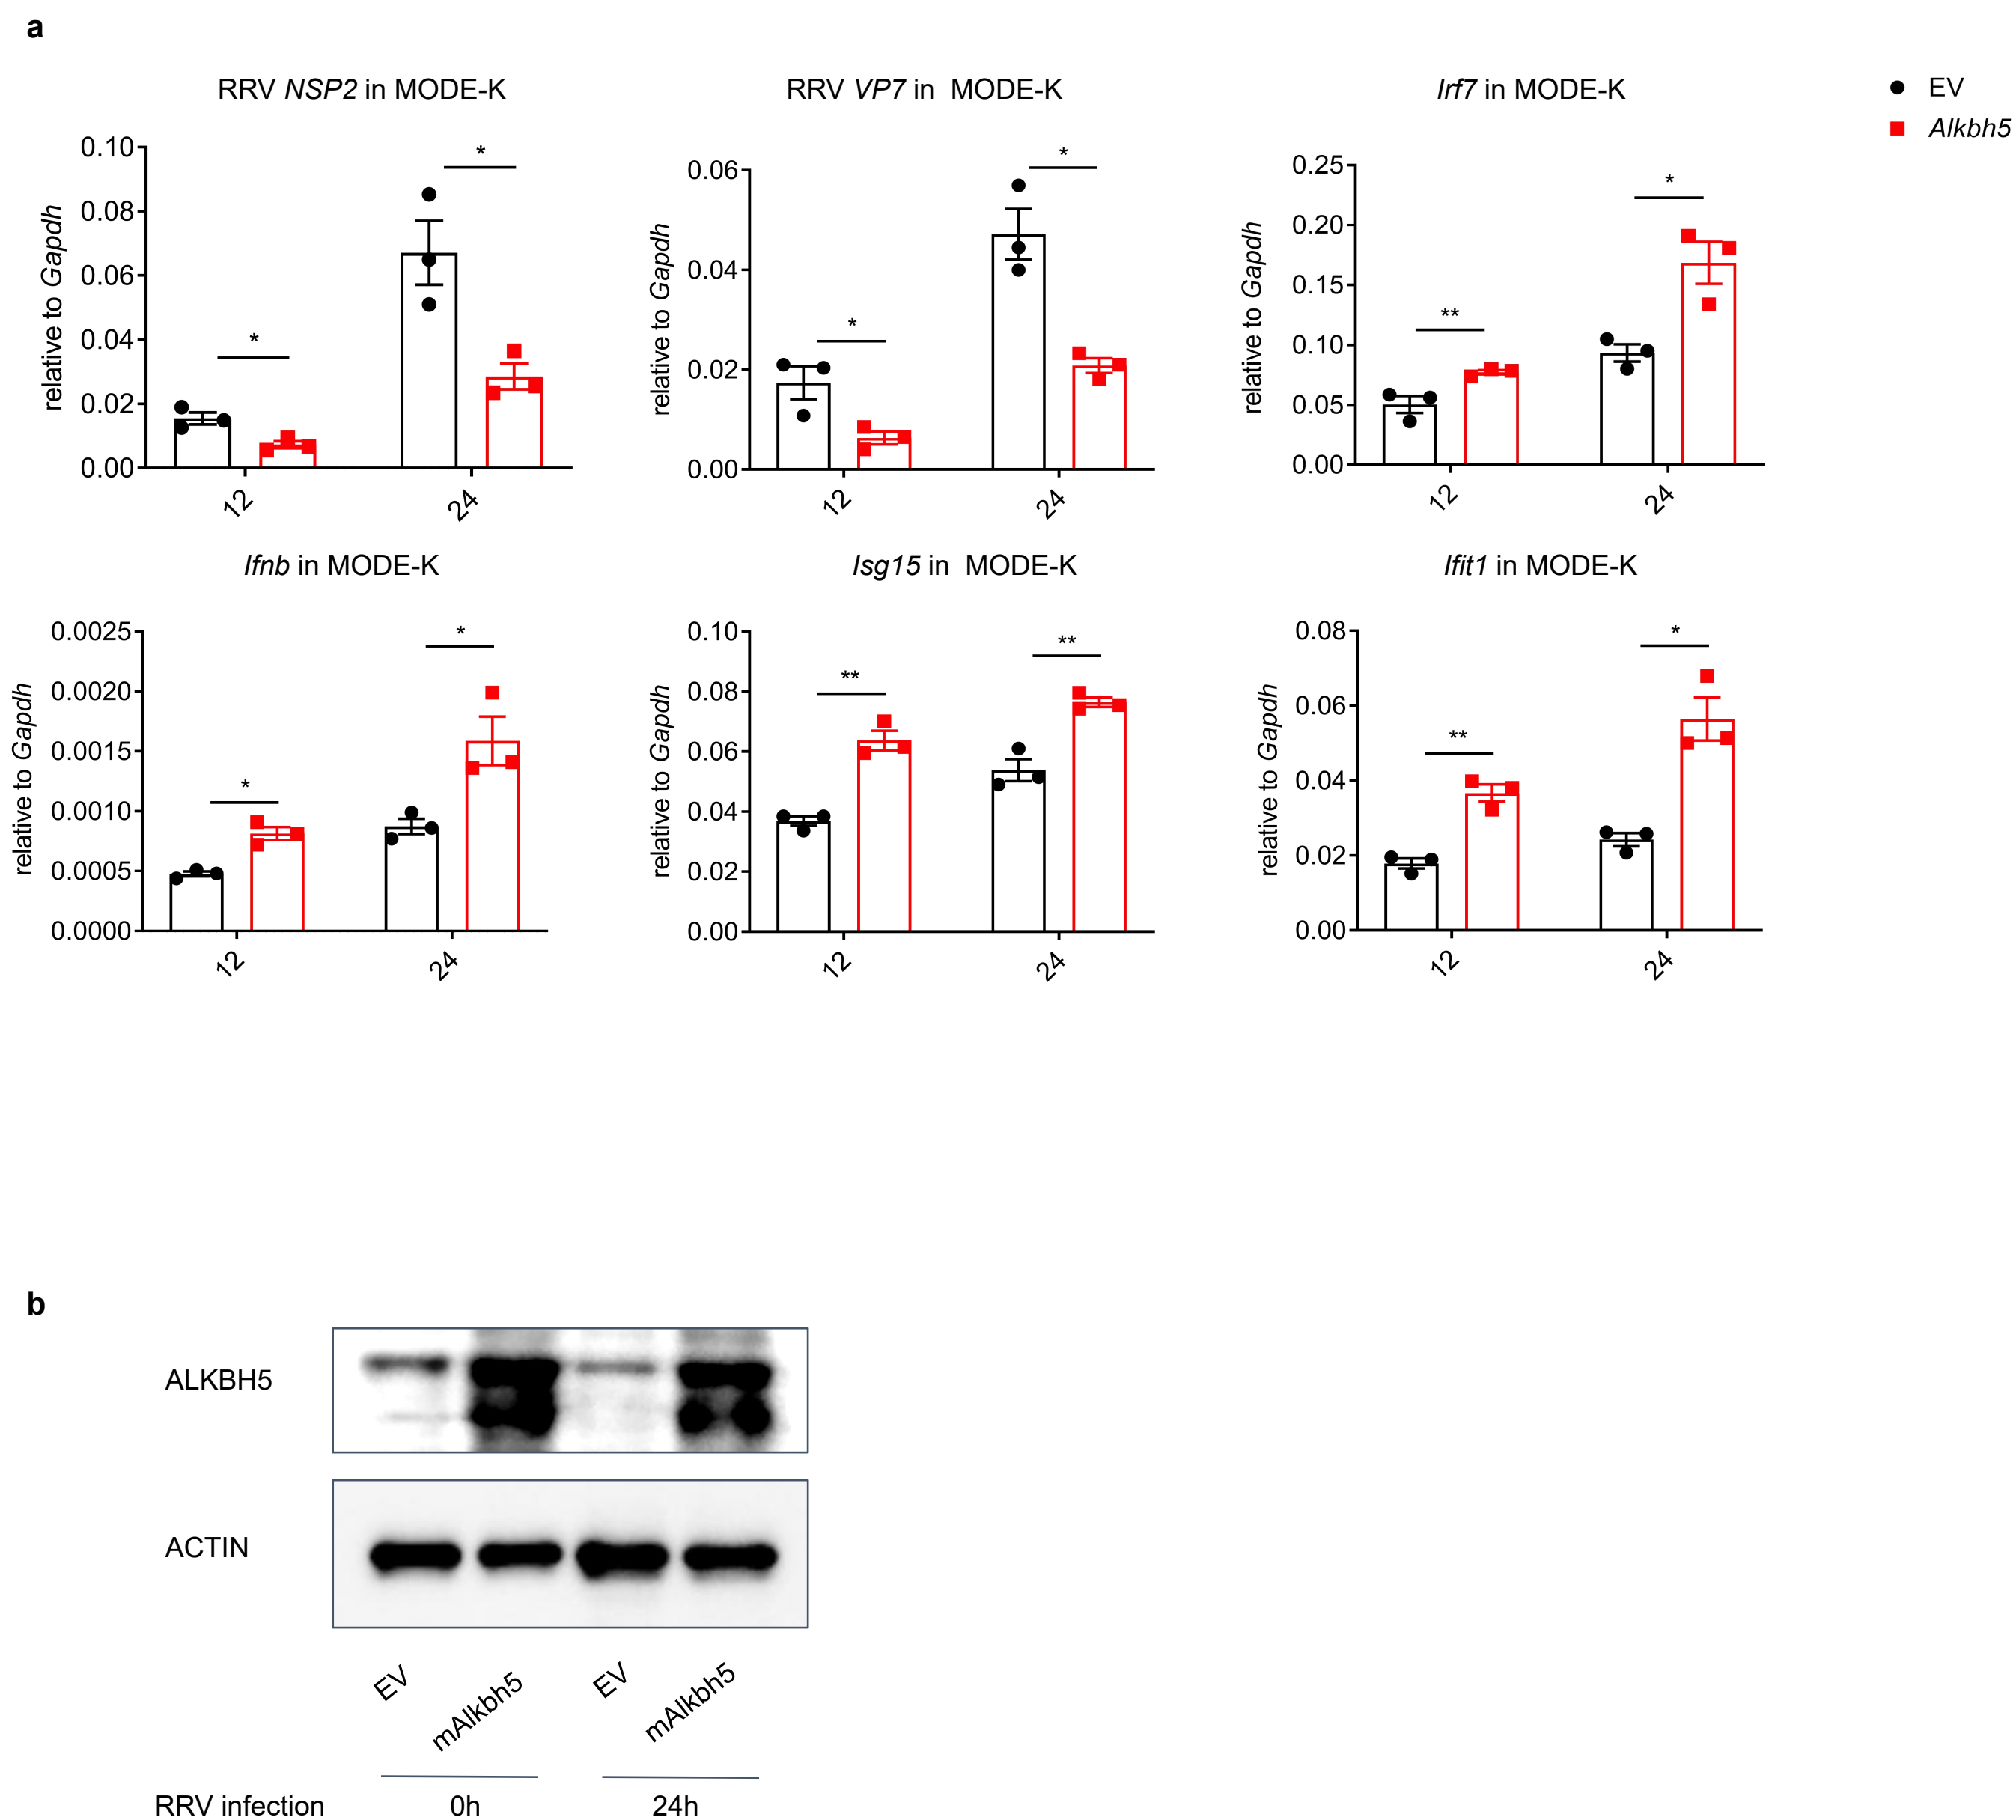

**Figure 4-figure supplement 2. ALKBH5 over-expression in MODE-K cells results in enhanced IFN response and increased resistance to Rhesus rotavirus infection.**

**(a)** MODE-K cells were transduced with Lentivirus (expressing pLVX-EV-puro or pLVX-m*Alkbh5*-puro). qPCR analysis of virus genes and *Ifn/ISGs* in Rhesus rotavirus-infected EV and m*Alkbh5* over-expressing cells at indicated hours post infection (hpi) (mean  $\pm$  SEM), statistical significance was determined by Student's t-test (\* $P < 0.05$ , \*\* $P < 0.005$ , NS., not significant).

**(b)** Expression level of ALKBH5 in EV and m*Alkbh5* over-expressed MODE-K cells at indicated hours post infection.

Experiments in **(a)** and **(b)** are repeated twice.
