# Supplementary material for: m6A modifications regulate intestinal immunity and rotavirus infection
Source: eLife journal article supplement (doi:10.7554/elife.73628), 2022-01-31
Supplement: supp [file Figure 1b.xlsx]

## Sheet: Sheet1
m6A dot blot analysis of total RNA in ileum tissues from mice with different ages. The m6A signals and MB staining signals were quantified by imageJ. The quantitative m6A signals were normalized to quantitative MB staining signals.
relative m6A modification
		1w	1.43517	1.14555	1.07564	1.05253
		2w	1.26933	0.900989	0.551624	0.845458
		3w	0.568815	0.316257	0.484286	0.525952
		4w	0.386839	0.339757	0.552702
	biological replicates
	(mean ± s.e.m., Student’s t-test, **P < 0.005, ***P < 0.001, NS., not significant)
