# Supplementary material for: m6A modifications regulate intestinal immunity and rotavirus infection
Source: eLife journal article supplement (doi:10.7554/elife.73628), 2022-01-31
Supplement: supp [file figure 1c.xlsx]

## Sheet: Sheet1
MS analysis of m6A level in ileum tissue from mice with different ages. (mean ± SEM), Statistical significance was determined by Student’s t-test (*P < 0.05, NS., not significant).
m6A/A
%
	1w	0.193182	0.185734	0.197318
	2w	0.184638	0.18415	0.188835
	3w	0.168906	0.154426	0.173504
	4w	0.156236	0.172569	0.172605
		biological replicates (n=3, mean ± SEM)
