# Supplementary material for: m6A modifications regulate intestinal immunity and rotavirus infection
Source: eLife journal article supplement (doi:10.7554/elife.73628), 2022-01-31
Supplement: supp [file Figure 1d.xlsx]

## Sheet: Sheet1
qPCR analysis of indicated genes in ileum tissues from mice with different ages
mRNA relative to HPRT(△△CT)	Alkbh5
		1w	0.523027	0.581029	0.53074	0.627035
		2w	0.432376	0.491903	0.82462	0.5978
		3w	1.09864	0.838389	0.849533	0.609328
		4w	1.02552	1.10241	1.08471
	Fto
		1w	0.172621	0.157247	0.181764	0.162235
		2w	0.252367	0.0966781	0.184201	0.176252
		3w	0.27965	0.173604	0.195333	0.130978
		4w	0.208207	0.17652	0.184684
	Mettl3
		1w	0.395157	0.253529	0.264414	0.256547
		2w	0.262166	0.154904	0.202502	0.208074
		3w	0.257514	0.228261	0.296031	0.196292
		4w	0.30995	0.324979	0.331638
	Mettl14
		1w	0.156066	0.12435	0.127045	0.134087
		2w	0.161829	0.203169	0.234413	0.144433
		3w	0.191977	0.143187	0.174136	0.1277
		4w	0.177681	0.120189	0.160744
	Wtap
		1w	0.960589	0.713546	0.992284	0.803764
		2w	0.867343	0.578134	0.688581	0.805724
		3w	1.25928	0.960352	0.95684	0.762246
		4w	1.46668	1.25747	0.539105
	biological replicates
	(mean ± s.e.m., Student’s t-test, *P < 0.05, ***P<0.001, NS., not significant)
