# Supplementary material for: m6A modifications regulate intestinal immunity and rotavirus infection
Source: eLife journal article supplement (doi:10.7554/elife.73628), 2022-01-31
Supplement: supp [file Figure 1f.xlsx]

## Sheet: Sheet1
m6A dot blot analysis of total RNA in ileum tissue at 2 dpi. The m6A signals and MB staining signals were quantified by imageJ. The quantitative m6A signals were normalized to quantitative MB staining signals.
relative m6A modification
	WT (PBS)				WT (RV infection)				Mettl3△IEC (PBS)				Mettl3△IEC (RV infection)
	1.60918	1.65798	2.22383		2.80531	2.94509	2.65703		0.570294	0.642689	1.05871		0.967966	0.87344	0.740943
		biological replicates
		(mean ± s.e.m., Student’s t-test, *P<0.05, ***P<0.001,NS., not significant)
