# Supplementary material for: m6A modifications regulate intestinal immunity and rotavirus infection
Source: eLife journal article supplement (doi:10.7554/elife.73628), 2022-01-31
Supplement: supp [file Figure 1g.xlsx]

## Sheet: Sheet1
Mettl3△IEC mice and littermate controls were infected by rotavirus EW strain at 8 days post birth.
	RV-NSP2
relative to GAPDH(△△CT)	WT						Mettl3△IEC
	7.62523	2.57894	3.26693	9.62682			0.00135906	0.0110768	0.0705766	0.00402331
	RV-VP7
	WT						Mettl3△IEC
	6.1832	1.77207	1.63488	4.45355			0.00113283	0.005752	0.0354421	0.00386981
	Mettl3
	WT						Mettl3△IEC
	0.0198353	0.0321119	0.02	0.04			0.000913169	0.002	0.00659266	0.004
		biological replicates
		(mean ± s.e.m., Student’s t-test, *P<0.05)
