# Supplementary material for: m6A modifications regulate intestinal immunity and rotavirus infection
Source: eLife journal article supplement (doi:10.7554/elife.73628), 2022-01-31
Supplement: supp [file figure 1h.xlsx]

## Sheet: Sheet1
Mettl3△IEC mice and littermate controls were infected by rotavirus EW strain at 8 days post birth. qPCR analysis of RV viral loads in fecal samples.
copies/g stool		RV-VP4
	WT					Mettl3△IEC
	22847201171	30886055290	20720931685	20720931685		5.31925e+08	1270814212	87253106	3.06487e+08
		RV-VP7
	WT					Mettl3△IEC
	143467000000	273395000000	152810000000	29393253821		9147738979	7457611842	1822157556	8135008324
	biological replicates
	(mean ± s.e.m., Student’s t-test, *P<0.05, ***P<0.001)
