# Supplementary material for: m6A modifications regulate intestinal immunity and rotavirus infection
Source: eLife journal article supplement (doi:10.7554/elife.73628), 2022-01-31
Supplement: supp [file figure 1i.xlsx]

## Sheet: Sheet1
qPCR analysis of indicated genes in Rhesus rotavirus (RRV)-infected HT-29 cells transduced with Mettl3 sgRNA or control sgRNA, at indicated hours post infection (hpi)
		RRV-NSP2
relative to Gapdh(△△CT)		sgEV					sgMettl3
	6h	0.000857732	0.00130404	0.000769032	0.00134644		0.000618423	0.000598808	0.000629698	0.000572202
	12h	2.19406	1.20604	3.14135			2.4861	3.44119	1.30803
	24h	1.76472	1.92783	2.14119	2.01682		1.13032	0.973869	0.819231
		RRV-VP7
		sgEV					sgMettl3
	6	0.000339405	0.000513277	0.00047301	0.000811781		0.000400947	0.00023696	0.000194412	0.0002183
	12	0.931242	0.898988	1.70959			1.29601	1.56894	0.519006
	24	0.863786	0.51262	0.95133	0.821359		0.399035	0.414048	0.288284
	biological replicates
	(mean ± s.e.m., Student’s t-test, *P < 0.05, ***P < 0.001, NS., not significant)
