# Supplementary material for: m6A modifications regulate intestinal immunity and rotavirus infection
Source: eLife journal article supplement (doi:10.7554/elife.73628), 2022-01-31
Supplement: supp [file figure 2f.xlsx]

## Sheet: Sheet1
Mettl3△IEC mice and littermate controls were infected by EW at 8 days post birth. qPCR analysis of the Irf7 expression in ileum and jejunum from Mettl3△IEC mice and littermate control at 2 dpi
relative to Hprt(△△CT)			WT				Mettl3△IEC
		jejunum	0.314232	0.365812	0.258588	0.395148	0.789093	0.838445	0.450189
		ileum	0.29621	0.422249	0.461475	0.40442	0.716024	0.626463	0.672659
		biological replicates
		(mean ± s.e.m., Student’s t-test, *P<0.05, **P<0.005)
