# Supplementary material for: m6A modifications regulate intestinal immunity and rotavirus infection
Source: eLife journal article supplement (doi:10.7554/elife.73628), 2022-01-31
Supplement: supp [file figure 2g.xlsx]

## Sheet: Sheet1
q-PCR analysis of Irf7 mRNA in Mettl3 knockdown HT-29 cells or control cells in indicated time points post actinomycin D treatment.
normalized expression(to t=0 CT value )
		sgEV			sgMettl3
	0h	1	1	1	1	1	1
	1h	0.523012	0.502301	0.583012	0.582292	0.502292	0.682292
	3h	0.347834	0.384783	0.268339	0.458984	0.409836	0.508984
	6h	0.257117	0.207117	0.157117	0.659211	0.592107	0.502107
	biological replicates
	(mean ± s.e.m., Student’s t-test, *P<0.05, ***P<0.001, NS., not significant)
