# Supplementary material for: m6A modifications regulate intestinal immunity and rotavirus infection
Source: eLife journal article supplement (doi:10.7554/elife.73628), 2022-01-31
Supplement: supp [file figure 2h.xlsx]

## Sheet: Sheet1
Relative luciferase activity of sgEV and sgMettl3 HEK293T cells transfected with pmirGLO-Irf7-3’UTR (Irf7-WT) or pmirGLO-Irf7-3’UTR containing mutated m6A modification sites (Irf7-MUT).
The firefly luciferase activity was normalized to Renilla luciferase activity.
		Irf7-WT-sgEV			Irf7-Mut-sgEV			Irf7-WT-sgMettl3			Irf7-Mut-sgMettl3
		1.63415	1.77946	1.78719	1.98523	2.15005	2.08783	2.10795	1.93682	1.91954	1.72933	2.32535	1.94246
		biological replicates
		(mean ± s.e.m., Student’s t-test, *P<0.05, NS., not significant)
