# Supplementary material for: m6A modifications regulate intestinal immunity and rotavirus infection
Source: eLife journal article supplement (doi:10.7554/elife.73628), 2022-01-31
Supplement: supp [file figure 2i.xlsx]

## Sheet: Sheet1
Mettl3△IEC mice and littermate control and were infected by EW at 8 days post birth. qPCR analysis of selected IFNs and ISGs in ileum tissue at 2 dpi.
mRNA relative to Hprt(△△CT)
		Ifnb	WT				Mettl3△IEC
			0.00111196	0.00196109	0.0013238	0.00247431	0.00299885	0.00246453	0.00384494
		Ifnl3	WT				Mettl3△IEC
			0.00455683	0.0109183	0.00600938	0.0123768	0.016847	0.0141779	0.0274001
		Oas1a	WT				Mettl3△IEC
			1.00726	1.50288	1.48322	1.65001	2.28557	1.6981	1.70477
		Isg15	WT				Mettl3△IEC
			1.57798	2.93147	2.04606	1.41095	5.45369	6.20677	5.91087
			biological replicates
			(mean ± s.e.m., Student’s t-test, *P<0.05, **P<0.005)
