# Supplementary material for: m6A modifications regulate intestinal immunity and rotavirus infection
Source: eLife journal article supplement (doi:10.7554/elife.73628), 2022-01-31
Supplement: supp [file figure 3a-3c.xlsx]

## Sheet: Sheet1
WT control mice, Mettl3△IEC mice, Irf7-/- mice and Mettl3ΔIECIrf7-/- mice are all littermates. They were infected by RV EW at 8 days post birth. qPCR analysis of selected IFNs (a), ISGs (b), or Irf7 (c) expression in ileum from indicated groups of mice at 2 dpi
	3a						3a						3b						3b
Relative to Hprt(△△CT)	Ifnb	WT	Mettl3△IEC	Irf7-/-	Mettl3△IEC, Irf7-/-		Ifnl3	WT	Mettl3△IEC	Irf7-/-	Mettl3△IEC, Irf7-/-		Isg15	WT	Mettl3△IEC	Irf7-/-	Mettl3△IEC, Irf7-/-		Ifit1	WT	Mettl3△IEC	Irf7-/-	Mettl3△IEC, Irf7-/-
		0.000225203	0.000819361	9.48105e-05	8.43196e-07			0.00530922	0.00702055	0.00269808	0.0057			0.709692	0.675743	0.259811	0.0859086			1.36901	1.07577	0.809321	0.563563
		0.000336475	0.000558807	5.21476e-05	9.41463e-07			0.00686361	0.0080553	0.00414922	0.00175179			0.410408	0.77671	0.140918	0.489031			0.710066	0.985922	0.333744	0.780991
		0.000548278	0.000423985	0.000166397	0.000136341			0.00633447	0.0102858	0.00731348	0.00108212			0.527619	1.09266	0.332128	0.647344			0.862637	1.21501	0.769591	0.50495
		0.000385915	0.000991025	8.83402e-05	0.000236341			0.00841672	0.00965886	0.00324374	0.00491051			0.564031	1.28954	0.07223	0.418078			0.623988	2.10974	0.512717	0.379789
		0.000185279		0.000110944				0.00631743		0.00417235				0.533609		0.325855				0.637394		0.2449
		0.000322344		9.75184e-05				0.00463651		0.00775004				0.325683		0.159579				0.596209		0.445673
		0.000180144		0.000147476				0.00415273		0.00330703				0.338537		0.103179				0.470914		0.390354
	3c
	Irf7	WT	Mettl3△IEC	Irf7-/-	Mettl3△IEC, Irf7-/-
		0.291649	0.773473	9.13586e-05	1.6196e-05
		0.264724	0.704836	5.91567e-05	2.53079e-05
		0.257043	0.54368	8.94543e-05	2.641e-05
		0.171727	1.2203	7.84379e-05	2.75178e-05
		0.250309		4.28043e-05
		0.20607		1.65999e-05
		0.178595		2.23872e-05
		biological replicates
		(mean ± s.e.m., Student’s t-test, *P < 0.05, **P < 0.005, ***P < 0.001, ****P < 0.0001, NS., not significant)
