# Supplementary material for: m6A modifications regulate intestinal immunity and rotavirus infection
Source: eLife journal article supplement (doi:10.7554/elife.73628), 2022-01-31
Supplement: supp [file figure 3d.xlsx]

## Sheet: Sheet1
qPCR analysis of fecal rotaviral shedding in indicated groups of mice at 4 dpi
copies/g stool	VP4 in mice feces		WT	Mettl3△IEC	Irf7-/-	Mettl3△IEC, Irf7-/-		VP7 in mice feces		WT	Mettl3△IEC	Irf7-/-	Mettl3△IEC, Irf7-/-
			1880219736	5.37659e+07	8.82274e+08	3.62252e+08				1637935216	1.07728e+08	9.74158e+08	4.19353e+08
			2500459190	1.28548e+08	1102076907	4.55654e+08				3092258818	8.93866e+07	1101049590	8.20955e+08
			1600404791	1.01243e+07	3.81628e+08	2.67696e+08				1714799375	2.20822e+07	3.21268e+08	3.46786e+08
			1470765130	3.63705e+07		7.79562e+07				1507051151	9.87124e+07		6.47299e+07
			5522498916	1.47647e+07						5634841853	1.83491e+07
			biological replicates
			(mean ± s.e.m., Student’s t-test, *P<0.05, NS., not significant)
