# Supplementary material for: m6A modifications regulate intestinal immunity and rotavirus infection
Source: eLife journal article supplement (doi:10.7554/elife.73628), 2022-01-31
Supplement: supp [file figure 3e-3f.xlsx]

## Sheet: Sheet1
qPCR analysis of RV proteins expression (e) or Mettl3 and Irf7 (f) in ileum from indicated groups of mice at 4 dpi
relative to Gapdh(△△CT)		NSP2 in ileum		WT	Mettl3△IEC	Irf7-/-	Mettl3△IEC, Irf7-/-		VP7 in ileum		WT	Mettl3△IEC	Irf7-/-	Mettl3△IEC, Irf7-/-		Mettl3 in ileum IEC		WT	Mettl3△IEC	Irf7-/-	Mettl3△IEC, Irf7-/-		Irf7 in ileum		WT	Mettl3△IEC	Irf7-/-	Mettl3△IEC, Irf7-/-
				5.75741	0.00135906	3.13103	0.154503				6.1832	0.00113283	1.56267	0.144782				0.021	0.009	0.0239876	0.008				0.0232674	0.00145431	0.000449679	0.000101143
				3.45871	0.0110768	3.09905	0.766489				1.77207	0.005752	1.73005	0.321818				0.026	0.001	0.026354	0.003				0.0788781	0.013259	0.000661323	0.000161082
				5.06517	0.0705766	4.032	0.271181				1.63488	0.0354421	2.15765	0.0385154				0.03356	0.007	0.018	0.00787				0.0171572	0.00713756	0.000302857	0.000340596
				7.62523	0.00402331		0.185424				4.45355	0.00386981		0.093502				0.024	0.008		0.01108				0.0901167	0.0124719		0.000196011
				2.57894			0.659615				3.07083	0.00741638		0.394926				0.0181	0.011		0.00976				0.018123	0.0026587		9.33714e-05
				3.26693			0.0755908				1.60605			0.184347				0.013			0.01011				0.0482449			0.000226144
				9.62682							2.54901							0.022							0.0599725
				0.0129419
				biological replicates
				(mean ± s.e.m., Student’s t-test, *P < 0.05, **P < 0.005, ***P < 0.001, NS., not significant)
