# Supplementary material for: m6A modifications regulate intestinal immunity and rotavirus infection
Source: eLife journal article supplement (doi:10.7554/elife.73628), 2022-01-31
Supplement: supp [file figure 4b.xlsx]

## Sheet: Sheet1
WT mice were infected by RV EW at 8 days post birth. Immunoblotting with antibodies target ALKBH5, FTO, METTL14 and METTL3 in ileum tissue from mice infected with RV EW at 2 dpi or treated with PBS.
Quantitative analysis by imageJ
relative to ACTIN expression
	METTL3	PBS					RV infected
		0.731052	1.15966	1.31194	1.1813	1.26828	1.06744	1.46941	1.07809	1.07522	1.08063
	METTL14	PBS					RV infected
		1.55027	1.60092	1.70611	1.78953	1.91909	1.91492	2.16724	1.82941	1.59783	1.67829
	FTO	PBS					RV infected
		1.23181	1.49803	1.60528	1.71594	1.86709	1.87709	2.14005	1.73026	1.59746	1.78544
	ALKBH5	PBS					RV infected
		0.645873	1.06928	1.54021	1.32047	1.47974	0.472586	0.857282	0.519988	0.679451	0.726187
		biological replicates
		(mean ± s.e.m., Student’s t-test, *P<0.05, NS., not significant)
