# Supplementary material for: m6A modifications regulate intestinal immunity and rotavirus infection
Source: eLife journal article supplement (doi:10.7554/elife.73628), 2022-01-31
Supplement: supp [file figure 4c.xlsx]

## Sheet: Sheet1
Alkbh5△IEC mice and littermate controls were infected by RV EW at 8 days post birth. qPCR analysis of indicated genes expression in ileum.
Relative to Gapdh(△△CT)
IFNb in ileum	WT						Alkbh5△IEC
	0.000108799	0.000734192	8.85463e-05	0.000490817	2.78512e-05	0.0005	0.000221565	0.000103909	0.000213596	0.000184194	0.000119356
Ifnl3 in ileum	WT						Alkbh5△IEC
	0.00413094	0.00339552	0.00398509	0.00500784	0.000835934	0.000680474	0.00265552	0.00229889	0.00428234	0.00288728	0.00164073
Isg15 in ileum	WT						Alkbh5△IEC
	0.17193	0.112002	0.156812	0.248195	0.129068	0.145955	0.112977	0.113596	0.120424	0.101719	0.112149
Alkbh5 in ileum IEC	WT						Alkbh5△IEC
	0.00547243	0.00584351	0.0101307	0.0178642	0.0106626	0.00798235	0.0010313	3.7174e-05	0.000527153	0.00189604	0.000445254
Irf7 in ileum	WT						Alkbh5△IEC
	0.0235183	0.0150172	0.0381031	0.0798306	0.0402132	0.0298317	0.0218781	0.0331555	0.0367241	0.0270468	0.0315519
	biological replicates
	(mean ± s.e.m., Student’s t-test, *P<0.05, NS., not significant)
