# Supplementary material for: m6A modifications regulate intestinal immunity and rotavirus infection
Source: eLife journal article supplement (doi:10.7554/elife.73628), 2022-01-31
Supplement: supp [file figure 4d-4e.xlsx]

## Sheet: Sheet1
Alkbh5△IEC mice and littermate controls were infected by RV EW at 8 days post birth. qPCR analysis of viral shedding in feces (d), and viral proteins expression in ileum(e).
copies/g stool	VP4 in stool	WT						Alkbh5△IEC
		4301738082	2217541838	53035552369	4466503380	4267107268	22006577091	3516386392	2765325989	2672318866	2777409647	45826822803
	VP7 in stool	WT						Alkbh5△IEC
		1777782526	7.86077e+08	18171656532	1739217060	1559911348	10185887197	1480952884	1196291472	1054915892	1322953763	22793520943
relative to Gapdh(△△CT)	NSP2 in ileum	WT						Alkbh5△IEC
		1.91246	1.67244	2.18307	2.04546	2.44393	0.821071	3.0708	2.44367	2.7151	2.51655	1.12735
	VP7 in ileum	WT						Alkbh5△IEC
		1.11908	1.01981	1.1126	1.50198	0.588412	0.501513	1.51141	1.69018	1.81858	1.04534	0.602777
	biological replicates
	(mean ± s.e.m., Student’s t-test, NS., not significant)
