# Supplementary material for: m6A modifications regulate intestinal immunity and rotavirus infection
Source: eLife journal article supplement (doi:10.7554/elife.73628), 2022-01-31
Supplement: supp [file sup fig 1b.xlsx]

## Sheet: Sheet1
Quantitative analysis of (b)(mean ± SEM), Statistical significance was determined by Student’s t-test (*P < 0.05, NS., not significant).
relative to TUBULIN
	1w	0.591698	0.560455	0.280513
	2w	0.420978	0.497931	0.613008
	3w	1.2165	1.29514	0.893015
	4w	1.58653	2.01515	1.13157
		biological replicates (n=3, mean ± SEM)
