# Supplementary material for: m6A modifications regulate intestinal immunity and rotavirus infection
Source: eLife journal article supplement (doi:10.7554/elife.73628), 2022-01-31
Supplement: supp [file sup fig s1c.xlsx]

## Sheet: Sheet1
m6A-RIP-qPCR confirms Irf7 as an m6A-modified gene in IECs. RNA of sgEV and sgMettl3 MODE-K cells was incubated with an anti-m6A antibody (Sigma Aldrich ABE572-I). The eluted RNA and input were processed as described in ‘RT-qPCR’ section, the data were normalized to the input samples (n=3, mean ± SEM, Statistical significance was determined by Student’s t-test (*P < 0.05, **P < 0.005, NS., not si…
relative m6A level
(normalized)
		sgEV				sgMettl3
	Irf7 primer1	1.08514	0.855931	1.05893		0.397132	0.378411	0.364441
	Irf7 primer2	1.18096	0.98514	0.833895		0.545297	0.589131	0.46163
	Tlr3-positive	1.01313	1.08702	0.899845		0.519034	0.563894	0.504363
	Rps14-negative	0.970894	1.03993	0.996129		0.961432	0.924977	0.907189
	biological replicates (n=3, mean ± SEM)
