# Supplementary material for: m6A modifications regulate intestinal immunity and rotavirus infection
Source: eLife journal article supplement (doi:10.7554/elife.73628), 2022-01-31
Supplement: supp [file sup-figure 1a.xlsx]

## Sheet: Sheet1
Relative expression level of Alkbh5 and Fto in human intestinal enteroid, mice IEC and mice IEC cell MODE-K.
		human intestinal enteroid(FPKM)					mice IEC(FPKM)					MODE-K(relative to Gapdh)
		ALKBH5	46.3796	47.5558			Alkbh5	26.2121	26.2587			Alkbh5	0.0052689	0.00675669	0.00631279
		FTO	0.529716	0.42445			Fto	10.4365	6.70078			Fto	0.00202205	0.00154015	0.00157811
			biological replicates
			(mean ± s.e.m.)
