# Supplementary material for: m6A modifications regulate intestinal immunity and rotavirus infection
Source: eLife journal article supplement (doi:10.7554/elife.73628), 2022-01-31
Supplement: supp [file sup-figure 2a.xlsx]

## Sheet: Sheet1
MODE-K cells were transduced with Lentivirus (expressing pLVX-EV-puro or pLVX-mAlkbh5-puro). qPCR analysis of virus genes and IFN/ISGs in Rhesus rotavirus-infected EV and mAlkbh5 overexpessing cells at indicated hours post infection (hpi) (mean ± SEM), statistical significance was determined by Student’s t-test (*P < 0.05, **P < 0.005, NS., not significant), at least three replicate experiments w…
Relative to Gapdh
	NSP2
		hours	EV			Alkbh5
		12	0.0126	0.0149	0.019	0.0094	0.0068	0.0056
		24	0.051	0.065	0.08529	0.0256	0.0235	0.0365
	VP7
			EV			Alkbh5
		12	0.0204	0.0108	0.021	0.0065	0.0085	0.004
		24	0.04	0.0445	0.05696	0.0182	0.021	0.0233
	Irf7
			EV			Alkbh5
		12	0.0364	0.0562	0.0588	0.0785	0.0738	0.0798
		24	0.0802	0.105	0.09528	0.1809	0.1339	0.19105
	Ifnb
			EV			Alkbh5
		12	0.00044	0.00051	0.00048	0.00072	0.00091	0.00081
		24	0.00086	0.00099	0.00077	0.00136	0.00141	0.00199
	Isg15
			EV			Alkbh5
		12	0.0337	0.0385	0.03846	0.0701	0.0595	0.0615
		24	0.049	0.061	0.0515	0.0743	0.0755	0.0796
	Ifit1
			EV			Alkbh5
		12	0.01515	0.0189	0.0195	0.0398	0.0322	0.038
		24	0.0207	0.0262	0.0258	0.0513	0.0679	0.05
		biological replicates
		mean ± s.e.m. Student’s t-test (*P < 0.05, **P < 0.005, NS., not significant)
