# Supplementary material for: m6A modifications regulate intestinal immunity and rotavirus infection
Source: eLife journal article supplement (doi:10.7554/elife.73628), 2022-01-31
Supplement: supp [file sup-figure 2a.xlsx]

## Sheet: Sheet1
qPCR analysis of IFN/ISGs in Rhesus rotavirus-infected Mettl3 WT and KD HT-29 cells at indicated hours post infection (hpi).
mRNA relative to Gapdh(△△CT)		IRF7	sgEV				sgMettl3
		6	0.000371762	0.000313542	0.000557037	0.000588813	0.0015661	0.00132958	0.00120239	0.00147116
		12	0.000635744	0.000413717	0.00115187		0.00314724	0.00191648	0.00274672
		24	0.000688713	0.000960474	0.000729816	0.000503576	0.00253053	0.00230779	0.00240236
		IFNB	sgEV				sgMettl3
		6	0.000148773	0.000112288	0.000191118	0.000106128	0.000295751	0.000379812	0.000284572	0.000288985
		12	0.00057363	0.000293964	0.000369669		0.00382446	0.00373462	0.00313062
		24	0	0.000519429	0.000502625	0.00010752	0.00106078	0.000819601	0.00115871
		IFNL3	sgEV				sgMettl3
		6	0.000513906	0.000385674	0.000724863	0.000323695	0.000587	0.000561826	0.00025993	0.000353825
		12	0.000945167	0.000994085	0.000911696		0.0100109	0.00714777	0.0178651
		24	0.00094775	0.00129386	0.000702648	0.000586648	0.00358558	0.00112852	0.00141207
		IFIT1	sgEV				sgMettl3
		6	0.0104394	0.00628499	0.00893835	0.00587095	0.0340019	0.024465	0.0127186	0.0216553
		12	0.0109382	0.00774709	0.00676716		0.0171988	0.0174638	0.0906012
		24	0.0189394	0.0403555	0.0167334	0.0117985	0.154874	0.134039	0.108112
		CXCL10	sgEV				sgMettl3
		6	0.000863737	0.000453895	0.000479443	0.00030384	0.00212182	0.0018966	0.00161782	0.00170215
		12	0.00136137	0.000844499	0.000844245		0.00309456	0.00339491	0.00413632
		24	0.000608682	0.000891055	0.000837797	0.000672585	0.00318224	0.0030815	0.00437728
		biological replicates
		(mean ± s.e.m., Student’s t-test, (*P < 0.05, **P < 0.005, ***P < 0.001, NS., not significant)
