# Supplementary material for: m6A modifications regulate intestinal immunity and rotavirus infection
Source: eLife journal article supplement (doi:10.7554/elife.73628), 2022-01-31
Supplement: supp [file sup-figure 2b.xlsx]

## Sheet: Sheet1
Quantitative analysis of m6A dot blot analysis of total RNA in ileum tissues from germ free mice with different ages. Methylene blue (MB) staining was the loading control.
relative m6A modification
		1w				3w
		0.135312	0.322809	0.507365		0.479147	0.401105	0.257927	0.572783
		biological replicates
		(mean ± s.e.m., Student’s t-test, (NS., not significant)
