# Supplementary material for: m6A modifications regulate intestinal immunity and rotavirus infection
Source: eLife journal article supplement (doi:10.7554/elife.73628), 2022-01-31
Supplement: supp [file sup-figure 3a.xlsx]

## Sheet: Sheet1
WT and Mettl3△IEC mice were infected by rotavirus EW strain at 8 days post birth. MS analysis of m6A level in ileum tissue from mice at 2 dpi (mean ± SEM), Statistical significance was determined by Student’s t-test (**P < 0.005).
m6A/A (%)
			PBS					RV infected
			0.150103	0.16292	0.168816	0.160112		0.184191	0.214044	0.187313	0.200807
		biological replicates
		(mean ± s.e.m., Student’s t-test, (*P < 0.05, **P < 0.005, ***P < 0.001, NS., not significant)
