# Supplementary material for: m6A modifications regulate intestinal immunity and rotavirus infection
Source: eLife journal article supplement (doi:10.7554/elife.73628), 2022-01-31
Supplement: supp [file sup-figure 3a.xlsx]

## Sheet: Sheet1
qPCR analysis of viral RNAs, IFNs, and ISGs in Rhesus rotavirus-infected Mettl3 WT and KO MA104 cells at 24 hours post infection (hpi)
relative to Gapdh(△△CT)	NSP2	WT control					Mettl3 ko
		0.225061	0.285652	0.204114	0.185679		0.0743029	0.0405247	0.0352977
	VP7	WT control					Mettl3 ko
		0.102929	0.11454	0.0704021	0.0621981		0.034533	0.017989	0.0110908
	IRF7	WT control					Mettl3 ko
		0.00482492	0.00528035	0.00596203	0.00566619		0.0126035	0.013609	0.0100791
	IFIT1	WT control					Mettl3 ko
		0.0448628	0.00225894	0.0024622	0.00687003		0.0107776	0.0457756	0.0248538
	IFNB	WT control					Mettl3 ko
		1.05262e-05	0.000143331	3.49089e-06	7.95414e-05		0.000290341	8.54132e-05	0.000100341
	IFNL	WT control					Mettl3 ko
		9.88226e-05	0.000584395	0.000738381	0.00187959		0.0036871	0.00255427	0.00119985
	biological replicates
	(mean ± s.e.m., Student’s t-test, *P < 0.05, **P < 0.005, ***P < 0.001, NS., not significant)
