# Supplementary material for: m6A modifications regulate intestinal immunity and rotavirus infection
Source: eLife journal article supplement (doi:10.7554/elife.73628), 2022-01-31
Supplement: supp [file sup-figure 3a.xlsx]

## Sheet: Sheet1
Total RNA was extracted from IECs from 1-week-old WT mice infected by RV for 2 days. Fragmented RNA was incubated with an anti-m6A antibody (Sigma Aldrich ABE572) and IgG IP Grade Rabbit polyclonal antibody(abcam, lot: 934197). The eluted RNA and input were processed as described in ‘RT-qPCR’ section, the data were normalized to the input samples, Rps14 was chosen as a negative control.
%input
(normalized to IgG control)	VP1		4.8323	2.0946		1
	VP2		17.115	9.91471		1
	VP3		8.26453	7.34729		1
	VP4		11.0249	3.5482		1
	VP6		7.69618	4.57597		1
	VP7		6.77793	3.54375		1
	NSP1		9.27935	4.39345		1
	NSP2		7.40696	5.9968		1
	NSP3		21.049	21.9206		1
	NSP4		9.97333	5.64487		1
	NSP5/6		9.5912	7.10532		1
	negative ctl-Rps14		1.55268	0.778695		1
	biological replicates (n=2, mean ± SEM)
