# Supplementary material for: m6A modifications regulate intestinal immunity and rotavirus infection
Source: eLife journal article supplement (doi:10.7554/elife.73628), 2022-01-31
Supplement: supp [file sup-figure 4a.xlsx]

## Sheet: Sheet1
WT and Irf7-/- MEF cell were transduced with lentivirus expressing pLVX-EV-puro, pLVX-Irf7-WT-puro or pLVX-Irf7-Mut-puro containing mutated m6A modification sites. qPCR analysis of genes in different cells at indicated hours post infection (hpi) (mean ± SEM). Statistical significance was determined by Student’s t-tests between groups (*P < 0.05, **P < 0.005, ***P < 0.001, NS., not significant).
mRNA relative to Gapdh(△△CT)
	NSP2
		hours	WT(EV)			Irf7 -/-(EV)			Irf7 -/-(Irf7-wt)			Irf7 -/-(Irf7-Mut)
		0	2.9894e-05	1.8976e-05	2.976e-05	1.67803e-05	2.10935e-05	2.219e-05	1.08967e-05	3.41265e-06	1.325e-06	6.17628e-06	1.45203e-05	9.89e-06
		6	0.021586	0.021861	0.028	0.0468	0.0553	0.0573	0.0147536	0.0225468	0.02011	0.00871206	0.0118379	0.008331
		12	0.0954	0.143	0.113	0.182225	0.4295	0.398	0.0325622	0.0249427	0.03319	0.0155038	0.0192764	0.01673
	VP7
			WT(EV)			Irf7-/-(EV)			Irf7-/-(Irf7-wt)			Irf7-/-(Irf7-Mut)
		0	1.3425e-05	1.6532e-05	0.000119	4.17611e-06	2.07248e-05	1.098e-05	0	0.000985864	9.67e-05	0	0	0
		6	0.0159283	0.0146087	0.01924	0.0283	0.027	0.02054	0.00986016	0.0108691	0.015	0.00598289	0.00218889	0.00336559
		12	0.0581	0.0923	0.0700944	0.158699	0.1396	0.102195	0.0192637	0.0187643	0.0228188	0.0102136	0.0133563	0.0100499
	Ifnb
			WT(EV)			Irf7-/-(EV)			Irf7-/-(Irf7-wt)			Irf7-/-(Irf7-Mut)
		0	0.0009879	0.0010928	0.0008987	0.000236793	0.000218739	0.00021	0.00363726	0.00395308	0.0031	0.00439754	0.00553345	0.0052
		6	0.0268987	0.02858	0.027	0.00473676	0.00547005	0.00378738	0.0467461	0.0487676	0.0498	0.0711	0.0538	0.06
		12	0.0348775	0.0309873	0.036	0.00054704	0.000401546	0.000553248	0.0539303	0.0511237	0.0572	0.0774553	0.0913739	0.1098
	Irf7
			WT（EV)			Irf7-/-(EV)			Irf7-/-(Irf7-wt)			Irf7-/-(Irf7-Mut)
		0	0.0363799	0.0521241	0.044	3.06739e-06	1.71524e-06	2.7e-06	0.106149	0.0947013	0.1198	0.142914	0.174433	0.1543
		6	0.0439804	0.050501	0.0473	5.81748e-06	3.79424e-06	1.71524e-06	0.11204	0.119173	0.12423	0.139355	0.151402	0.16321
		12	0.0626896	0.0593392	0.06987	0	6.06444e-06	8.04e-06	0.104855	0.107419	0.12857	0.16105	0.152203	0.16899
	Ifit1
			WT(EV)			Irf7-/-(EV)			Irf7-/-(Irf7-wt)			Irf7-/-(Irf7-Mut)
		0	0.0628405	0.0908803	0.08266	0.0422875	0.0339603	0.02131	0.130763	0.0853565	0.1241	0.111495	0.134872	0.1422
		6	0.157385	0.158567	0.1396	0.118946	0.10937	0.09831	0.15714	0.152201	0.162	0.169262	0.2138	0.185313
		12	0.295186	0.243462	0.215524	0.146949	0.19308	0.172081	0.391875	0.438656	0.35983	0.447373	0.561991	0.58632
	Isg15
			WT(EV)			Irf7-/-(EV)			Irf7-/-(Irf7-wt)			Irf7-/-(Irf7-Mut)
		0	0.0907	0.0831	0.1013	0.030059	0.0421968	0.026	0.158898	0.119558	0.131	0.184528	0.19929	0.197
		6	0.13	0.119	0.141	0.0693301	0.0637498	0.05	0.191612	0.176522	0.2	0.198065	0.21478	0.23
		12	0.201	0.198	0.218	0.164092	0.146818	0.132	0.25886	0.293165	0.3	0.388253	0.383733	0.34553
			(mean ± s.e.m., Student’s t-test, *P < 0.05, **P < 0.005, ***P < 0.001, NS., not significant)
