# Supplementary material for: m6A modifications regulate intestinal immunity and rotavirus infection
Source: eLife journal article supplement (doi:10.7554/elife.73628), 2022-01-31
Supplement: supp [file sup-figure 5a.xlsx]

## Sheet: Sheet1
qPCR analysis of Irf7 and ISGs in ileum from mice at the ages of 1-4 weeks post birth
		Irf7
mRNA relative to Hprt(△△CT)		1 week	0.303186	0.221124	0.302468	0.30812
		2 week	0.337789	0.419759	0.346641	0.325868
		3 week	0.728398	1.04878	1.14637	0.833861
		4 week	0.694768	0.953803	0.724029
		Isg15
		1 week	0.146835	0.104887	0.124056	0.108183
		2 week	0.229831	0.238431	0.311939	0.159889
		3 week	0.754636	1.21638	0.791241	1.2156
		4 week	0.600644	0.974687	0.659416
		Oas1b
		1 week	0.013183	0.00645368	0.00717135	0.00971462
		2 week	0.0125807	0.00952373	0.0111292	0.00693366
		3 week	0.0249556	0.0347083	0.0233971	0.03128
		4 week	0.0179403	0.0281257	0.0190916
		biological replicates
		(mean ± s.e.m., Student’s t-test, *P < 0.05, **P < 0.005, NS., not significant)
