# Supplementary figures and images for: m6A modifications regulate intestinal immunity and rotavirus infection
Source: eLife journal article supplement (doi:10.7554/elife.73628), 2022-01-31

a

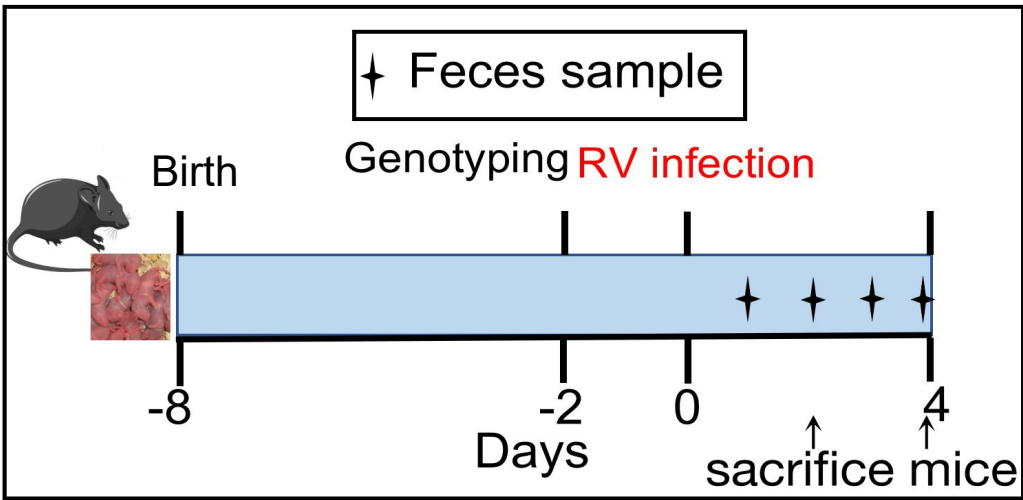

Figure 1-figure supplement 4. Schematic design of RV infection model.

Supplement: supp [file elife-73628-supp-v1.zip]
